# Supplementary material for: Co-Expression Networks Reveal Potential Regulatory Roles of miRNAs in Fatty Acid Composition of Nelore Cattle
Source: Front Genet. 2019 Jul 11;10:651. doi: 10.3389/fgene.2019.00651 (PMC6637853; doi:10.3389/fgene.2019.00651)
Supplement: Supplementary file 5 [file Table_5.xlsx]

## Sheet: H_MEmagenta
Number of miRNAs inside MEmagenta: 9
miRNAs	MM	Signaling Pathway
bta-miR-181a	0.94087	ID:bta04931 Name: Insulin resistance - Bos taurus (cow)
bta-miR-33b	0.93518	C=114; O=16; E=4.36; R=3.67; PValue=6.23e-06; FDR=9.25e-04
bta-miR-181b	0.924209	userid	Gene Symbol	Gene Name	Entrez Gene
bta-miR-196a	0.863472	ENSBTAG00000034436	PDPK1	3-phosphoinositide dependent protein kinase 1	100138102
bta-miR-149-5p	0.807767	ENSBTAG00000008063	PPARA	peroxisome proliferator activated receptor alpha	281992
bta-miR-2465	0.767701	ENSBTAG00000008441	SOCS3	suppressor of cytokine signaling 3	282081
bta-miR-2284w	0.571294	ENSBTAG00000016253	G6PC3	glucose-6-phosphatase catalytic subunit 3	369023
bta-miR-2350	0.529243	ENSBTAG00000021999	CPT1A	carnitine palmitoyltransferase 1A	506812
bta-miR-190b	0.486119	ENSBTAG00000020614	PRKCE	protein kinase C epsilon	507041
		ENSBTAG00000021523	STAT3	signal transducer and activator of transcription 3	508541
		ENSBTAG00000017639	RPS6KA3	ribosomal protein S6 kinase A3	511190
		ENSBTAG00000010606	PPP1R3B	protein phosphatase 1 regulatory subunit 3B	514428
		ENSBTAG00000006909	PIK3CB	phosphatidylinositol-4,5-bisphosphate 3-kinase catalytic subunit beta	517948
		ENSBTAG00000002015	RPS6KA6	ribosomal protein S6 kinase A6	526227
		ENSBTAG00000000902	OGT	O-linked N-acetylglucosamine (GlcNAc) transferase	532053
		ENSBTAG00000012447	PPP1CB	protein phosphatase 1 catalytic subunit beta	538829
		ENSBTAG00000007876	MAPK8	mitogen-activated protein kinase 8	539941
		ENSBTAG00000017942	CRTC2	CREB regulated transcription coactivator 2	540959
		ENSBTAG00000004189	MLXIP	MLX interacting protein	783217

## Sheet: H_MEblack
Number of miRNAs inside MEblack: 12
miRNAs	MM	Signaling Pathway
bta-miR-1271	0.988247	ID:bta04010 Name:MAPK signaling pathway - Bos taurus (cow)
bta-miR-99a-5p	0.988091	C=256; O=19; E=5.02; R=3.78; PValue=5.54e-07; FDR=7.43e-05
bta-miR-100	0.987428	userid	Gene Symbol	Gene Name	Entrez Gene
bta-miR-99b	0.970781	ENSBTAG00000009233	RAC1	ras-related C3 botulinum toxin substrate 1 (rho family, small GTP binding protein Rac1)	281440
bta-miR-199a-5p	0.812489	ENSBTAG00000009565	RASA1	RAS p21 protein activator 1	282032
bta-miR-2299-5p	0.803959	ENSBTAG00000002297	CACNB4	calcium voltage-gated channel auxiliary subunit beta 4	282161
bta-miR-2284b	0.764	ENSBTAG00000018035	TGFBR1	transforming growth factor beta receptor 1	282382
bta-miR-185	0.7393	ENSBTAG00000007882	CACNA1B	calcium voltage-gated channel subunit alpha1 B	282410
bta-miR-2285ad	0.70321	ENSBTAG00000009835	CACNA1G	calcium voltage-gated channel subunit alpha1 G	282411
bta-miR-324	0.622415	ENSBTAG00000035697	GNG12	G protein subunit gamma 12	286850
bta-miR-105a	0.599218	ENSBTAG00000016005	PPP3CA	protein phosphatase 3 catalytic subunit alpha	286852
bta-miR-885	0.492801	ENSBTAG00000014825	NLK	nemo like kinase	507204
		ENSBTAG00000016442	MAP4K3	mitogen-activated protein kinase kinase kinase kinase 3	507624
		ENSBTAG00000008151	MAP3K3	mitogen-activated protein kinase kinase kinase 3	508943
		ENSBTAG00000003257	STK4	serine/threonine kinase 4	514886
		ENSBTAG00000008006	RASGRP3	RAS guanyl releasing protein 3	523745
		ENSBTAG00000005871	MECOM	MDS1 and EVI1 complex locus	532209
		ENSBTAG00000033983	MAP2K1	mitogen-activated protein kinase kinase 1	533199
		ENSBTAG00000010191	PAK1	p21 (RAC1) activated kinase 1	533729
		ENSBTAG00000009065	MAP3K5	mitogen-activated protein kinase kinase kinase 5	537380
		ENSBTAG00000001497	MRAS	muscle RAS oncogene homolog	540803
		ENSBTAG00000009778	KRAS	KRAS proto-oncogene, GTPase	541140

## Sheet: H_MEturquoise
Supplementary Table S5. List of miRNAs inside each module and signaling pathways from hub miRNAs (in bold) for High (H) and Low (L) Oleic Acid (OA) groups of Nelore cattle.
Number of miRNAs inside MEturquoise: 39
miRNAs	MM	Signaling Pathway
bta-miR-30a-5p	0.959676	ID:bta04931 Name:Insulin resistance - Bos taurus (cow)
bta-miR-26a	0.946613	C=114; O=15; E=5.12; R=2.93; PValue=1.64e-04; FDR=6.96e-03
bta-miR-23b-3p	0.945877	userid	Gene Symbol	Gene Name	Entrez Gene
bta-miR-30d	0.940369	ENSBTAG00000012019	IRS2	insulin receptor substrate 2	100300012
bta-miR-146b	0.933293	ENSBTAG00000005474	CREB1	cAMP responsive element binding protein 1	281713
bta-miR-361	0.924783	ENSBTAG00000008441	SOCS3	suppressor of cytokine signaling 3	282081
bta-miR-1388-5p	0.924061	ENSBTAG00000017024	PPARGC1A	PPARG coactivator 1 alpha	338446
bta-miR-146a	0.92069	ENSBTAG00000002917	LOC504219	5'-AMP-activated protein kinase subunit gamma-2	504219
bta-miR-374b	0.919587	ENSBTAG00000018984	PIK3CD	phosphatidylinositol-4,5-bisphosphate 3-kinase catalytic subunit delta	504531
bta-miR-195	0.917343	ENSBTAG00000008719	PRKCD	protein kinase C delta	505708
bta-miR-374a	0.908402	ENSBTAG00000010664	PRKCQ	protein kinase C theta	505901
bta-miR-7	0.898814	ENSBTAG00000006909	PIK3CB	phosphatidylinositol-4,5-bisphosphate 3-kinase catalytic subunit beta	517948
bta-let-7c	0.89041	ENSBTAG00000002215	GFPT2	glutamine-fructose-6-phosphate transaminase 2	530101
bta-miR-423-5p	0.878514	ENSBTAG00000021308	IRS1	insulin receptor substrate 1	538598
bta-miR-10b	0.853736	ENSBTAG00000012447	PPP1CB	protein phosphatase 1 catalytic subunit beta	538829
bta-miR-16b	0.838615	ENSBTAG00000018747	PRKAA2	protein kinase AMP-activated catalytic subunit alpha 2	538954
bta-miR-10a	0.823037	ENSBTAG00000007876	MAPK8	mitogen-activated protein kinase 8	539941
bta-miR-204	0.78452	ENSBTAG00000027397	PPP1R3D	protein phosphatase 1 regulatory subunit 3D	782160
bta-miR-1246	0.770015
bta-miR-432	0.768747
bta-let-7f	0.745285
bta-miR-708	0.732189
bta-miR-379	0.731029
bta-miR-98	0.689955
bta-miR-425-5p	0.676095
bta-miR-486	0.675908
bta-miR-181c	0.629281
bta-miR-331-5p	0.60795
bta-miR-335	0.554317
bta-miR-499	0.542647
bta-miR-224	0.50419
bta-miR-181d	0.496703
bta-miR-15b	0.477022
bta-miR-193a-5p	0.44289
bta-miR-1839	0.439649
bta-miR-450b	0.404854
bta-miR-142-5p	0.324563
bta-miR-34a	0.317952
bta-miR-34c	0.297107

## Sheet: L_MEturquoise
Number of miRNAs inside MEturquoise: 44
miRNAs	MM	Signaling Pathway
bta-miR-30a-5p	0.983522	ID:bta04152 Name:AMPK signaling pathway - Bos taurus (cow)
bta-miR-195	0.952176	C=128; O=24; E=7.86; R=3.05; PValue=7.11e-07; FDR=1.06e-04			Entrez Gene
bta-miR-374a	0.950525	userid	Gene Symbol	Gene Name	100125881
bta-miR-361	0.94902	ENSBTAG00000038696	RAB8A	RAB8A, member RAS oncogene family	100137872
bta-miR-146a	0.947316	ENSBTAG00000017788	AKT3	AKT serine/threonine kinase 3	100138102
bta-miR-26a	0.938711	ENSBTAG00000034436	PDPK1	3-phosphoinositide dependent protein kinase 1	100138150
bta-miR-30d	0.934239	ENSBTAG00000020277	NA	protein phosphatase 2 scaffold subunit Abeta	100300012
bta-miR-7	0.933108	ENSBTAG00000012019	IRS2	insulin receptor substrate 2	281713
bta-miR-146b	0.920361	ENSBTAG00000005474	CREB1	cAMP responsive element binding protein 1	282306
bta-miR-23b-3p	0.919371	ENSBTAG00000009232	PIK3CA	phosphatidylinositol-4,5-bisphosphate 3-kinase catalytic subunit alpha	282307
bta-miR-10b	0.907504	ENSBTAG00000010989	PIK3R1	phosphoinositide-3-kinase regulatory subunit 1	286879
bta-miR-425-5p	0.902151	ENSBTAG00000038321	LIPE	lipase, hormone-sensitive	338446
bta-miR-379	0.866577	ENSBTAG00000017024	PPARGC1A	PPARG coactivator 1 alpha	369023
bta-miR-10a	0.859393	ENSBTAG00000016253	G6PC3	glucose-6-phosphatase catalytic subunit 3	497205
bta-miR-374b	0.859097	ENSBTAG00000005910	LEPR	leptin receptor	504531
bta-miR-331-5p	0.798085	ENSBTAG00000018984	PIK3CD	phosphatidylinositol-4,5-bisphosphate 3-kinase catalytic subunit delta	506618
bta-miR-99a-5p	0.793076	ENSBTAG00000044105	FOXO1	forkhead box O1	508373
bta-let-7c	0.756679	ENSBTAG00000000948	RAB2A	RAB2A, member RAS oncogene family	512665
bta-miR-1388-5p	0.738919	ENSBTAG00000014387	PRKAB2	protein kinase AMP-activated non-catalytic subunit beta 2	517948
bta-miR-99b	0.735237	ENSBTAG00000006909	PIK3CB	phosphatidylinositol-4,5-bisphosphate 3-kinase catalytic subunit beta	521730
bta-miR-181c	0.725658	ENSBTAG00000017662	EEF2K	eukaryotic elongation factor 2 kinase	529146
bta-miR-16b	0.712542	ENSBTAG00000002625	MAP3K7	mitogen-activated protein kinase kinase kinase 7	533440
bta-miR-2299-5p	0.703262	ENSBTAG00000005190	TSC1	tuberous sclerosis 1	533617
bta-let-7b	0.685719	ENSBTAG00000019784	PPP2R5E	protein phosphatase 2 regulatory subunit B'epsilon	538598
bta-miR-15b	0.677165	ENSBTAG00000021308	IRS1	insulin receptor substrate 1	538954
bta-miR-423-5p	0.676764	ENSBTAG00000018747	PRKAA2	protein kinase AMP-activated catalytic subunit alpha 2	783373
bta-miR-486	0.652922	ENSBTAG00000000985	RAB10	RAB10, member RAS oncogene family
bta-miR-215	0.595656
bta-miR-574	0.577708
bta-miR-24	0.52832
bta-miR-100	0.520911
bta-miR-499	0.489556
bta-miR-592	0.473195
bta-miR-142-5p	0.465928
bta-miR-2285g	0.463761
bta-miR-362-5p	0.459035
bta-miR-382	0.455055
bta-miR-1246	0.433454
bta-miR-450b	0.417573
bta-miR-2284n	0.356289
bta-miR-1271	0.339284
bta-miR-192	0.33772
bta-miR-2419-5p	0.312089
bta-miR-30e-5p	0.309309

## Sheet: L_MEpink
Number of miRNAs inside MEpink: 8
miRNAs	MM	Signaling Pathway
bta-miR-185	0.812227	ID:bta704910 Name:Insulin signaling pathway - Bos taurus (cow)
bta-miR-365-5p	0.886566	C=145; O=51; E=24.82; R=2.05; PValue=9.76e-08; FDR=7.25e-06			Entrez Gene
bta-miR-296-5p	0.885142	userid	Gene Symbol	Gene Name	100137872
bta-miR-204	0.847358	ENSBTAG00000017788	AKT3	AKT serine/threonine kinase 3	100138102
bta-miR-2422	0.758629	ENSBTAG00000034436	PDPK1	3-phosphoinositide dependent protein kinase 1	100139910
bta-miR-2284ab	0.742347	ENSBTAG00000014205	NA	protein kinase cAMP-dependent type II regulatory subunit alpha	100300012
bta-miR-27a-5p	0.607873	ENSBTAG00000012019	IRS2	insulin receptor substrate 2	281152
bta-miR-193a-5p	0.572665	ENSBTAG00000015980	FASN	fatty acid synthase	281854
		ENSBTAG00000007599	IKBKB	inhibitor of nuclear factor kappa B kinase subunit beta	282081
		ENSBTAG00000008441	SOCS3	suppressor of cytokine signaling 3	282306
		ENSBTAG00000009232	PIK3CA	phosphatidylinositol-4,5-bisphosphate 3-kinase catalytic subunit alpha	282318
		ENSBTAG00000011198	PPP1CC	protein phosphatase 1 catalytic subunit gamma	282322
		ENSBTAG00000006642	PRKACA	protein kinase cAMP-activated catalytic subunit alpha	282323
		ENSBTAG00000011953	PRKACB	protein kinase cAMP-activated catalytic subunit beta	282324
		ENSBTAG00000014426	PRKAG1	protein kinase AMP-activated non-catalytic subunit gamma 1	338437
		ENSBTAG00000012007	SOCS2	suppressor of cytokine signaling 2	338446
		ENSBTAG00000017024	PPARGC1A	PPARG coactivator 1 alpha	369023
		ENSBTAG00000016253	G6PC3	glucose-6-phosphatase catalytic subunit 3	504531
		ENSBTAG00000018984	PIK3CD	phosphatidylinositol-4,5-bisphosphate 3-kinase catalytic subunit delta	505012
		ENSBTAG00000004241	G6PC2	glucose-6-phosphatase catalytic subunit 2	505568
		ENSBTAG00000007910	EXOC7	exocyst complex component 7	506618
		ENSBTAG00000044105	FOXO1	forkhead box O1	507056
		ENSBTAG00000002883	RPTOR	regulatory associated protein of MTOR complex 1	507196
		ENSBTAG00000019838	SHC1	SHC adaptor protein 1	509613
		ENSBTAG00000027654	EIF4EBP1	eukaryotic translation initiation factor 4E binding protein 1	512665
		ENSBTAG00000014387	PRKAB2	protein kinase AMP-activated non-catalytic subunit beta 2	512670
		ENSBTAG00000003417	PHKG2	phosphorylase kinase catalytic subunit gamma 2	512696
		ENSBTAG00000011375	SHC3	SHC adaptor protein 3	512841
		ENSBTAG00000005665	CRK	CRK proto-oncogene, adaptor protein	513859
		ENSBTAG00000021100	PPP1R3F	protein phosphatase 1 regulatory subunit 3F	514428
		ENSBTAG00000010606	PPP1R3B	protein phosphatase 1 regulatory subunit 3B	515338
		ENSBTAG00000022058	ACACB	acetyl-CoA carboxylase beta	517948
		ENSBTAG00000006909	PIK3CB	phosphatidylinositol-4,5-bisphosphate 3-kinase catalytic subunit beta	520454
		ENSBTAG00000020791	RAPGEF1	Rap guanine nucleotide exchange factor 1	533440
		ENSBTAG00000005190	TSC1	tuberous sclerosis 1	534125
		ENSBTAG00000004709	MAPK9	mitogen-activated protein kinase 9	534923
		ENSBTAG00000001400	AKT2	AKT serine/threonine kinase 2	537631
		ENSBTAG00000020048	MAPK10	mitogen-activated protein kinase 10	537682
		ENSBTAG00000011643	SOS1	SOS Ras/Rac guanine nucleotide exchange factor 1	538598
		ENSBTAG00000021308	IRS1	insulin receptor substrate 1	538710
		ENSBTAG00000010184	G6PC	glucose-6-phosphatase catalytic subunit	538954
		ENSBTAG00000018747	PRKAA2	protein kinase AMP-activated catalytic subunit alpha 2	539277
		ENSBTAG00000025822	CALML4	calmodulin like 4	539361
		ENSBTAG00000007884	SREBF1	sterol regulatory element binding transcription factor 1	539941
		ENSBTAG00000007876	MAPK8	mitogen-activated protein kinase 8	540412
		ENSBTAG00000021988	SOCS4	suppressor of cytokine signaling 4	540682
		ENSBTAG00000008195	PHKG1	phosphorylase kinase catalytic subunit gamma 1	614838
		ENSBTAG00000005978	PIK3R5	phosphoinositide-3-kinase regulatory subunit 5	616576
		ENSBTAG00000032288	GCK	glucokinase	782160
		ENSBTAG00000027397	PPP1R3D	protein phosphatase 1 regulatory subunit 3D	783833
		ENSBTAG00000019167	INPPL1	inositol polyphosphate phosphatase like 1	786335
		ENSBTAG00000039958	NA	glycogen synthase 1	786886
		ENSBTAG00000015817	ELK1	ELK1, ETS transcription factor	787914
		ENSBTAG00000005315	RPS6	ribosomal protein S6

## Sheet: L_MEblue
Number of miRNAs inside MEblue: 72
miRNAs	MM	Signaling Pathway
bta-miR-20a	0.969069	ID:bta05205 Name:Proteoglycans in cancer - Bos taurus (cow)
bta-miR-16a	0.944751	C=205; O=17; E=6.07; R=2.8; PValue=1.17e-04; FDR=1.4e-02
bta-miR-30c	0.930602	userid	Gene Symbol	Gene Name	Entrez Gene
bta-miR-18a	0.922082	ENSBTAG00000034436	PDPK1	3-phosphoinositide dependent protein kinase 1	100138102
bta-miR-21-5p	0.918683	ENSBTAG00000002006	THBS1	thrombospondin 1	281530
bta-miR-22-5p	0.896903	ENSBTAG00000020935	HIF1A	hypoxia inducible factor 1 alpha subunit	281814
bta-miR-30f	0.870251	ENSBTAG00000020638	TIMP3	TIMP metallopeptidase inhibitor 3	282094
bta-miR-106b	0.858115	ENSBTAG00000010989	PIK3R1	phosphoinositide-3-kinase regulatory subunit 1	282307
bta-miR-211	0.85403	ENSBTAG00000011953	PRKACB	protein kinase cAMP-activated catalytic subunit beta	282323
bta-miR-17-5p	0.841985	ENSBTAG00000017664	HGF	hepatocyte growth factor	282879
bta-miR-500	0.818162	ENSBTAG00000007159	ESR1	estrogen receptor 1	407238
bta-miR-582	0.808865	ENSBTAG00000014291	WNT2B	Wnt family member 2B	445420
bta-miR-145	0.79444	ENSBTAG00000006883	EIF4B	eukaryotic translation initiation factor 4B	505850
bta-miR-2284k	0.783133	ENSBTAG00000019434	PDCD4	programmed cell death 4	506724
bta-miR-451	0.760572	ENSBTAG00000021523	STAT3	signal transducer and activator of transcription 3	508541
bta-miR-28	0.726501	ENSBTAG00000019052	ANK3	ankyrin 3, node of Ranvier (ankyrin G)	511203
bta-miR-194	0.716819	ENSBTAG00000004672	RDX	radixin	517111
bta-miR-26b	0.716082	ENSBTAG00000018423	DDX5	DEAD-box helicase 5	533700
bta-miR-491	0.693756	ENSBTAG00000019155	FRS2	fibroblast growth factor receptor substrate 2	538624
bta-miR-1185	0.686549	ENSBTAG00000009778	KRAS	KRAS proto-oncogene, GTPase	541140
bta-miR-2465	0.678212
bta-miR-3613a	0.666331
bta-let-7g	0.609167
bta-miR-218	0.605794
bta-miR-708	0.590103
bta-miR-30b-5p	0.569338
bta-miR-664b	0.566027
bta-miR-29d-5p	0.56342
bta-miR-155	0.518501
bta-miR-98	0.436477
bta-miR-139	0.4275
bta-miR-34a	0.404102
bta-let-7a-5p	0.374963
bta-miR-383	0.371586
bta-miR-105a	0.358434
bta-miR-452	0.358145

## Sheet: L_MEyellow
Number of miRNAs inside MEyellow : 21
miRNAs	MM	Signaling Pathway
bta-miR-125b	0.963432	ID:bta04310 Name:Wnt signaling pathway - Bos taurus (cow)
bta-miR-151-5p	0.93859	C=149; O=38; E=19.14; R=1.99; PValue=1.84e-05; FDR=1.36e-03
bta-miR-485	0.933999	userid	Gene Symbol	Gene Name	Entrez Gene
bta-miR-126-5p	0.926391	ENSBTAG00000003397	CTBP2	C-terminal binding protein 2	281730
bta-miR-125a	0.846441	ENSBTAG00000005847	ROCK2	Rho associated coiled-coil containing protein kinase 2	282041
bta-miR-15a	0.844671	ENSBTAG00000011953	PRKACB	protein kinase cAMP-activated catalytic subunit beta	282323
bta-miR-33b	0.839918	ENSBTAG00000012341	CSNK2A1	casein kinase 2 alpha 1	282419
bta-miR-199b	0.839626	ENSBTAG00000013134	SOST	sclerostin	282880
bta-miR-32	0.778586	ENSBTAG00000016005	PPP3CA	protein phosphatase 3 catalytic subunit alpha	286852
bta-miR-1306	0.760093	ENSBTAG00000008338	PLCB1	phospholipase C beta 1	287026
bta-miR-191	0.743142	ENSBTAG00000040128	FZD4	frizzled class receptor 4	445416
bta-miR-628	0.714265	ENSBTAG00000002107	FZD1	frizzled class receptor 1	445417
bta-miR-196b	0.674679	ENSBTAG00000014291	WNT2B	Wnt family member 2B	445420
bta-miR-199a-5p	0.666506	ENSBTAG00000016577	AXIN1	axin 1	504357
bta-miR-2284b	0.603403	ENSBTAG00000014218	DKK1	dickkopf WNT signaling pathway inhibitor 1	504445
bta-miR-484	0.599172	ENSBTAG00000014825	NLK	nemo like kinase	507204
bta-miR-31	0.571765	ENSBTAG00000005788	VANGL1	VANGL planar cell polarity protein 1	513056
bta-miR-2320-5p	0.528247	ENSBTAG00000012510	NA	phospholipase C beta 3	515669
bta-miR-2284ac	0.523999	ENSBTAG00000017514	CCND1	cyclin D1	524530
bta-miR-196a	0.521088	ENSBTAG00000002625	MAP3K7	mitogen-activated protein kinase kinase kinase 7	529146
bta-miR-671	0.499227	ENSBTAG00000020221	WNT5A	Wnt family member 5A	530005
		ENSBTAG00000003045	BAMBI	BMP and activin membrane bound inhibitor	530147
		ENSBTAG00000020087	CAMK2A	calcium/calmodulin dependent protein kinase II alpha	530719
		ENSBTAG00000014463	CAMK2D	calcium/calmodulin dependent protein kinase II delta	532713
		ENSBTAG00000018852	APC	APC, WNT signaling pathway regulator	533233
		ENSBTAG00000001668	WNT7A	Wnt family member 7A	533782
		ENSBTAG00000004709	MAPK9	mitogen-activated protein kinase 9	534125
		ENSBTAG00000006844	LEF1	lymphoid enhancer binding factor 1	535399
		ENSBTAG00000020048	MAPK10	mitogen-activated protein kinase 10	537631
		ENSBTAG00000020590	FZD2	frizzled class receptor 2	538507
		ENSBTAG00000020957	FZD5	frizzled class receptor 5	538536
		ENSBTAG00000002940	WNT16	Wnt family member 16	538627
		ENSBTAG00000019336	DVL3	dishevelled segment polarity protein 3	539203
		ENSBTAG00000020644	GPC4	glypican 4	540179
		ENSBTAG00000016012	WNT3	wingless-type MMTV integration site family member 3	540753
		ENSBTAG00000004368	NFATC3	nuclear factor of activated T-cells 3	541127
		ENSBTAG00000021910	TBL1XR1	transducin beta like 1 X-linked receptor 1	614346
		ENSBTAG00000025191	SKP1	S-phase kinase associated protein 1	615427
		ENSBTAG00000001107	CACYBP	calcyclin binding protein	618428
		ENSBTAG00000012295	NKD1	naked cuticle homolog 1	618586
		ENSBTAG00000008596	PRICKLE1	prickle planar cell polarity protein 1	785152

## Sheet: L_MEgreen
Number of miRNAs inside MEgreen: 24
miRNAs	MM	Signaling Pathway
bta-miR-411a	0.964568	ID:bta04910 Name:Insulin signaling pathway - Bos taurus (cow)
bta-miR-136	0.905478	C=145; O=22; E=9.84; R=2.23; PValue=2.89e-04; FDR=1.07e-02
bta-miR-369-5p	0.900571	userid	Gene Symbol	Gene Name	Entrez Gene
bta-miR-660	0.894225	ENSBTAG00000017788	AKT3	AKT serine/threonine kinase 3	100137872
bta-miR-188	0.856285	ENSBTAG00000015325	MTOR	mechanistic target of rapamycin	100139219
bta-miR-380-3p	0.810138	ENSBTAG00000012019	IRS2	insulin receptor substrate 2	100300012
bta-miR-154b	0.765218	ENSBTAG00000015848	NA	phosphorylase kinase regulatory subunit alpha 1	100336808
bta-miR-424-5p	0.59458	ENSBTAG00000009232	PIK3CA	phosphatidylinositol-4,5-bisphosphate 3-kinase catalytic subunit alpha	282306
bta-miR-450a	0.442698	ENSBTAG00000014958	PRKAR2B	protein kinase cAMP-dependent type II regulatory subunit beta	282463
bta-miR-411c-5p	0.351478	ENSBTAG00000012007	SOCS2	suppressor of cytokine signaling 2	338437
bta-miR-2285ab	0.341043	ENSBTAG00000017024	PPARGC1A	PPARG coactivator 1 alpha	338446
bta-miR-190a	0.316462	ENSBTAG00000014387	PRKAB2	protein kinase AMP-activated non-catalytic subunit beta 2	512665
		ENSBTAG00000003417	PHKG2	phosphorylase kinase catalytic subunit gamma 2	512670
		ENSBTAG00000011375	SHC3	SHC adaptor protein 3	512696
		ENSBTAG00000006535	IRS4	insulin receptor substrate 4	514607
		ENSBTAG00000006909	PIK3CB	phosphatidylinositol-4,5-bisphosphate 3-kinase catalytic subunit beta	517948
		ENSBTAG00000020048	MAPK10	mitogen-activated protein kinase 10	537631
		ENSBTAG00000011643	SOS1	SOS Ras/Rac guanine nucleotide exchange factor 1	537682
		ENSBTAG00000021308	IRS1	insulin receptor substrate 1	538598
		ENSBTAG00000018747	PRKAA2	protein kinase AMP-activated catalytic subunit alpha 2	538954
		ENSBTAG00000025822	CALML4	calmodulin like 4	539277
		ENSBTAG00000009778	KRAS	KRAS proto-oncogene, GTPase	541140
		ENSBTAG00000008621	PRKAR1A	protein kinase cAMP-dependent type I regulatory subunit alpha	615074
		ENSBTAG00000019167	INPPL1	inositol polyphosphate phosphatase like 1	783833
		ENSBTAG00000015817	ELK1	ELK1, ETS transcription factor	786886
