# Supplementary material for: Co-Expression Networks Reveal Potential Regulatory Roles of miRNAs in Fatty Acid Composition of Nelore Cattle
Source: Front Genet. 2019 Jul 11;10:651. doi: 10.3389/fgene.2019.00651 (PMC6637853; doi:10.3389/fgene.2019.00651)
Supplement: Supplementary file 7 [file Table_7.xlsx]

## Sheet: OA
Supplemental Table 7: Full list of differential hubbing (DH) values of all genes and miRNAs used in PCIT analysis for Oleic Acid (OA) and Conjugated Linoleic Acid (CLA) content.
gene.ID	H.result.txt-L.result.txt
ENSBTAG00000040485	-905
ENSBTAG00000031806	-826
ENSBTAG00000007692	-799
ENSBTAG00000044830	-770
ENSBTAG00000007956	-753
ENSBTAG00000032775	-734
ENSBTAG00000045756	-732
ENSBTAG00000013356	-703
ENSBTAG00000021912	-697
ENSBTAG00000009861	-690
ENSBTAG00000044050	-690
ENSBTAG00000012540	-672
ENSBTAG00000009570	-652
ENSBTAG00000006429	-643
ENSBTAG00000038748	-640
ENSBTAG00000045548	-637
ENSBTAG00000025329	-633
ENSBTAG00000020196	-630
ENSBTAG00000045575	-627
ENSBTAG00000031778	-623
ENSBTAG00000019085	-613
ENSBTAG00000000326	-611
ENSBTAG00000032982	-605
ENSBTAG00000010745	-600
ENSBTAG00000018082	-587
ENSBTAG00000040210	-583
ENSBTAG00000012421	-582
ENSBTAG00000015582	-581
ENSBTAG00000007901	-580
ENSBTAG00000025372	-578
ENSBTAG00000008587	-575
ENSBTAG00000006689	-574
ENSBTAG00000046003	-574
ENSBTAG00000009208	-567
ENSBTAG00000010234	-565
ENSBTAG00000004777	-563
ENSBTAG00000007888	-559
ENSBTAG00000013763	-556
ENSBTAG00000005578	-555
ENSBTAG00000025775	-554
ENSBTAG00000004565	-551
ENSBTAG00000020658	-551
ENSBTAG00000045784	-548
ENSBTAG00000005665	-543
ENSBTAG00000021880	-543
ENSBTAG00000001388	-537
ENSBTAG00000026645	-537
ENSBTAG00000031785	-533
ENSBTAG00000007480	-530
ENSBTAG00000045753	-530
ENSBTAG00000011899	-529
ENSBTAG00000025181	-529
ENSBTAG00000013651	-522
ENSBTAG00000047787	-522
ENSBTAG00000039335	-520
ENSBTAG00000008462	-513
ENSBTAG00000005318	-512
ENSBTAG00000004797	-502
ENSBTAG00000031679	-502
ENSBTAG00000016354	-499
ENSBTAG00000012622	-497
ENSBTAG00000007175	-496
ENSBTAG00000034045	-496
ENSBTAG00000015980	-494
ENSBTAG00000039657	-492
ENSBTAG00000043519	-487
ENSBTAG00000007592	-484
ENSBTAG00000039453	-484
ENSBTAG00000001189	-483
bta_miR_34a	-481
ENSBTAG00000002508	-481
ENSBTAG00000009982	-480
ENSBTAG00000020285	-479
ENSBTAG00000021263	-479
ENSBTAG00000037679	-475
ENSBTAG00000009566	-473
ENSBTAG00000046440	-472
ENSBTAG00000047000	-472
ENSBTAG00000016421	-471
ENSBTAG00000008528	-470
ENSBTAG00000003100	-469
ENSBTAG00000000062	-468
ENSBTAG00000005205	-464
ENSBTAG00000003934	-462
ENSBTAG00000030517	-462
ENSBTAG00000022715	-461
ENSBTAG00000007508	-460
ENSBTAG00000010361	-459
ENSBTAG00000017921	-459
ENSBTAG00000030632	-457
ENSBTAG00000038650	-456
ENSBTAG00000000568	-455
ENSBTAG00000045893	-453
ENSBTAG00000007271	-452
ENSBTAG00000046528	-452
ENSBTAG00000006756	-450
ENSBTAG00000009732	-448
ENSBTAG00000025837	-444
ENSBTAG00000006879	-443
ENSBTAG00000004399	-441
ENSBTAG00000005433	-441
ENSBTAG00000018037	-441
ENSBTAG00000001979	-439
ENSBTAG00000008517	-437
ENSBTAG00000024509	-436
ENSBTAG00000018613	-434
ENSBTAG00000014215	-433
ENSBTAG00000002974	-431
ENSBTAG00000015294	-430
ENSBTAG00000003121	-429
ENSBTAG00000045022	-429
ENSBTAG00000014083	-427
ENSBTAG00000022681	-427
ENSBTAG00000038757	-424
ENSBTAG00000048273	-424
ENSBTAG00000046100	-423
ENSBTAG00000008625	-422
ENSBTAG00000046763	-421
ENSBTAG00000000607	-420
ENSBTAG00000011538	-419
ENSBTAG00000020253	-417
ENSBTAG00000047933	-417
ENSBTAG00000010182	-416
ENSBTAG00000034196	-414
ENSBTAG00000038291	-414
ENSBTAG00000045817	-412
ENSBTAG00000016350	-411
ENSBTAG00000006133	-408
ENSBTAG00000012342	-406
ENSBTAG00000016307	-405
ENSBTAG00000042696	-405
ENSBTAG00000046506	-405
ENSBTAG00000013560	-404
ENSBTAG00000019382	-404
ENSBTAG00000038702	-403
ENSBTAG00000006036	-402
ENSBTAG00000008709	-402
ENSBTAG00000004881	-401
ENSBTAG00000019071	-401
ENSBTAG00000047450	-401
ENSBTAG00000011205	-400
ENSBTAG00000017922	-399
ENSBTAG00000025028	-399
ENSBTAG00000025062	-399
ENSBTAG00000002550	-398
ENSBTAG00000029988	-397
ENSBTAG00000031572	-397
ENSBTAG00000001028	-396
ENSBTAG00000043987	-396
ENSBTAG00000003077	-394
ENSBTAG00000004706	-394
ENSBTAG00000019958	-394
ENSBTAG00000021071	-394
ENSBTAG00000022539	-393
ENSBTAG00000040518	-392
ENSBTAG00000024280	-390
ENSBTAG00000008438	-389
ENSBTAG00000025826	-389
ENSBTAG00000047073	-389
ENSBTAG00000011581	-387
ENSBTAG00000016124	-387
ENSBTAG00000010993	-386
ENSBTAG00000015951	-386
ENSBTAG00000000809	-383
ENSBTAG00000007782	-383
ENSBTAG00000038042	-381
ENSBTAG00000038843	-380
ENSBTAG00000002834	-379
ENSBTAG00000004788	-378
ENSBTAG00000019014	-377
ENSBTAG00000010947	-376
ENSBTAG00000008394	-375
ENSBTAG00000012411	-375
ENSBTAG00000047030	-375
ENSBTAG00000047996	-375
ENSBTAG00000019249	-374
ENSBTAG00000010338	-373
ENSBTAG00000047970	-373
ENSBTAG00000016285	-371
ENSBTAG00000005143	-370
ENSBTAG00000012484	-370
ENSBTAG00000016348	-370
ENSBTAG00000010135	-369
ENSBTAG00000021934	-369
ENSBTAG00000047434	-369
ENSBTAG00000007482	-368
ENSBTAG00000008325	-368
ENSBTAG00000009022	-368
ENSBTAG00000017550	-368
ENSBTAG00000018049	-368
ENSBTAG00000005691	-367
ENSBTAG00000047194	-366
ENSBTAG00000001435	-365
ENSBTAG00000014769	-365
ENSBTAG00000034978	-365
ENSBTAG00000006927	-364
ENSBTAG00000018364	-364
ENSBTAG00000011402	-363
ENSBTAG00000004630	-362
ENSBTAG00000008729	-361
ENSBTAG00000003607	-359
ENSBTAG00000040253	-358
ENSBTAG00000005309	-357
ENSBTAG00000010077	-357
ENSBTAG00000016334	-357
ENSBTAG00000011383	-356
ENSBTAG00000020244	-356
ENSBTAG00000019412	-354
ENSBTAG00000020813	-354
ENSBTAG00000018805	-353
ENSBTAG00000035926	-353
ENSBTAG00000006449	-352
ENSBTAG00000014088	-351
ENSBTAG00000004411	-350
ENSBTAG00000005306	-350
ENSBTAG00000007522	-350
ENSBTAG00000008025	-349
ENSBTAG00000008556	-349
ENSBTAG00000038495	-349
ENSBTAG00000001697	-348
ENSBTAG00000008140	-348
ENSBTAG00000039708	-348
ENSBTAG00000043993	-348
bta_miR_16a	-347
ENSBTAG00000016369	-347
ENSBTAG00000020865	-347
ENSBTAG00000010059	-346
ENSBTAG00000014340	-346
ENSBTAG00000021059	-346
ENSBTAG00000021964	-346
ENSBTAG00000024497	-346
ENSBTAG00000004088	-345
ENSBTAG00000019529	-344
ENSBTAG00000039793	-344
ENSBTAG00000014117	-343
ENSBTAG00000016855	-343
ENSBTAG00000018322	-342
ENSBTAG00000042553	-342
ENSBTAG00000004208	-341
ENSBTAG00000015369	-341
ENSBTAG00000008802	-340
ENSBTAG00000033217	-339
ENSBTAG00000047048	-339
ENSBTAG00000008072	-338
ENSBTAG00000011741	-338
ENSBTAG00000033446	-338
ENSBTAG00000002960	-337
ENSBTAG00000040161	-337
ENSBTAG00000004292	-336
ENSBTAG00000007722	-335
ENSBTAG00000014750	-335
ENSBTAG00000033136	-335
ENSBTAG00000001021	-333
ENSBTAG00000009500	-333
ENSBTAG00000012584	-333
ENSBTAG00000018408	-333
ENSBTAG00000045184	-333
ENSBTAG00000008016	-332
ENSBTAG00000019159	-332
bta_miR_500	-331
ENSBTAG00000008973	-331
ENSBTAG00000011190	-331
ENSBTAG00000016139	-331
ENSBTAG00000033174	-331
ENSBTAG00000043258	-331
ENSBTAG00000046814	-331
ENSBTAG00000046919	-330
ENSBTAG00000001080	-329
ENSBTAG00000003235	-329
ENSBTAG00000006735	-329
ENSBTAG00000007413	-328
ENSBTAG00000008385	-328
ENSBTAG00000046335	-328
ENSBTAG00000005064	-327
ENSBTAG00000006078	-327
ENSBTAG00000021512	-327
ENSBTAG00000038084	-327
ENSBTAG00000003197	-326
ENSBTAG00000000668	-325
ENSBTAG00000011847	-325
ENSBTAG00000015817	-325
ENSBTAG00000020250	-324
bta_miR_30f	-323
ENSBTAG00000002035	-323
ENSBTAG00000007827	-323
ENSBTAG00000008240	-323
ENSBTAG00000008300	-323
ENSBTAG00000009230	-323
ENSBTAG00000014969	-322
ENSBTAG00000021633	-322
ENSBTAG00000022931	-322
ENSBTAG00000042234	-322
ENSBTAG00000018893	-321
ENSBTAG00000030974	-321
ENSBTAG00000001571	-320
ENSBTAG00000008764	-320
ENSBTAG00000010165	-320
ENSBTAG00000022635	-320
ENSBTAG00000003539	-319
ENSBTAG00000021849	-319
ENSBTAG00000042504	-319
ENSBTAG00000046677	-319
ENSBTAG00000008028	-318
ENSBTAG00000011067	-318
ENSBTAG00000018660	-318
ENSBTAG00000039153	-318
ENSBTAG00000000707	-317
ENSBTAG00000002452	-317
ENSBTAG00000002469	-317
ENSBTAG00000015276	-317
ENSBTAG00000019271	-317
ENSBTAG00000030404	-317
ENSBTAG00000031824	-317
ENSBTAG00000046316	-317
ENSBTAG00000002693	-316
ENSBTAG00000037397	-316
ENSBTAG00000008656	-315
ENSBTAG00000012454	-315
ENSBTAG00000013477	-315
ENSBTAG00000015346	-315
ENSBTAG00000000029	-314
ENSBTAG00000009991	-314
ENSBTAG00000048153	-314
ENSBTAG00000004571	-313
ENSBTAG00000005236	-312
ENSBTAG00000015036	-312
ENSBTAG00000020314	-312
ENSBTAG00000002674	-311
ENSBTAG00000012434	-311
ENSBTAG00000012866	-311
ENSBTAG00000014472	-311
ENSBTAG00000016281	-311
ENSBTAG00000033169	-311
ENSBTAG00000039817	-311
ENSBTAG00000007273	-310
ENSBTAG00000026708	-310
ENSBTAG00000006168	-309
ENSBTAG00000017765	-309
ENSBTAG00000033837	-308
ENSBTAG00000001807	-307
ENSBTAG00000005972	-306
ENSBTAG00000009378	-306
ENSBTAG00000047484	-306
ENSBTAG00000007330	-305
ENSBTAG00000007996	-305
ENSBTAG00000013254	-305
ENSBTAG00000023367	-305
ENSBTAG00000040290	-305
ENSBTAG00000005086	-304
ENSBTAG00000011375	-304
bta_miR_21_5p	-303
ENSBTAG00000001987	-303
ENSBTAG00000005148	-303
ENSBTAG00000003405	-302
ENSBTAG00000006963	-302
ENSBTAG00000030200	-301
ENSBTAG00000003856	-300
ENSBTAG00000011960	-300
ENSBTAG00000015576	-300
ENSBTAG00000017245	-300
ENSBTAG00000022562	-300
ENSBTAG00000042652	-300
ENSBTAG00000008854	-299
ENSBTAG00000014044	-299
ENSBTAG00000004542	-298
ENSBTAG00000013426	-298
ENSBTAG00000014127	-298
ENSBTAG00000015749	-298
ENSBTAG00000000967	-297
ENSBTAG00000003708	-297
ENSBTAG00000007709	-297
ENSBTAG00000009837	-297
ENSBTAG00000007619	-296
ENSBTAG00000009309	-296
ENSBTAG00000013155	-296
ENSBTAG00000011237	-295
ENSBTAG00000017167	-295
ENSBTAG00000046110	-295
bta_miR_17_5p	-294
ENSBTAG00000004549	-294
ENSBTAG00000008105	-294
ENSBTAG00000016594	-294
ENSBTAG00000020514	-294
ENSBTAG00000027386	-294
ENSBTAG00000029778	-294
ENSBTAG00000034659	-294
ENSBTAG00000040042	-294
ENSBTAG00000043949	-294
ENSBTAG00000047078	-294
ENSBTAG00000008743	-293
ENSBTAG00000002381	-292
ENSBTAG00000004854	-292
ENSBTAG00000014102	-292
ENSBTAG00000019349	-292
ENSBTAG00000019513	-292
ENSBTAG00000000575	-291
ENSBTAG00000030539	-291
ENSBTAG00000042875	-291
ENSBTAG00000000916	-290
ENSBTAG00000007020	-290
ENSBTAG00000017409	-290
ENSBTAG00000024275	-290
ENSBTAG00000032017	-290
ENSBTAG00000005377	-289
ENSBTAG00000019771	-289
ENSBTAG00000006989	-288
ENSBTAG00000007661	-288
ENSBTAG00000014466	-288
ENSBTAG00000017369	-288
ENSBTAG00000042492	-287
ENSBTAG00000044132	-287
ENSBTAG00000046359	-287
ENSBTAG00000007423	-286
ENSBTAG00000007624	-286
ENSBTAG00000007217	-285
ENSBTAG00000010334	-285
ENSBTAG00000015432	-285
ENSBTAG00000022962	-285
ENSBTAG00000030255	-285
ENSBTAG00000045166	-285
ENSBTAG00000048071	-285
ENSBTAG00000020122	-284
ENSBTAG00000025167	-284
bta_miR_2299_5p	-282
ENSBTAG00000007553	-282
ENSBTAG00000024291	-282
ENSBTAG00000000838	-281
ENSBTAG00000004333	-281
ENSBTAG00000005016	-281
ENSBTAG00000005663	-281
ENSBTAG00000017783	-281
bta_miR_22_5p	-280
ENSBTAG00000007681	-280
ENSBTAG00000012497	-280
ENSBTAG00000015050	-280
ENSBTAG00000017680	-280
ENSBTAG00000014711	-279
ENSBTAG00000016573	-279
ENSBTAG00000021048	-279
ENSBTAG00000046966	-279
ENSBTAG00000002294	-278
ENSBTAG00000005195	-278
ENSBTAG00000006770	-278
ENSBTAG00000018941	-278
ENSBTAG00000021217	-278
ENSBTAG00000030119	-278
ENSBTAG00000038241	-278
ENSBTAG00000047207	-278
ENSBTAG00000047572	-278
ENSBTAG00000002639	-277
ENSBTAG00000003295	-277
ENSBTAG00000005478	-277
ENSBTAG00000010497	-277
ENSBTAG00000013937	-277
ENSBTAG00000001856	-276
ENSBTAG00000018399	-276
ENSBTAG00000026972	-276
ENSBTAG00000001517	-275
ENSBTAG00000004568	-275
ENSBTAG00000013509	-275
ENSBTAG00000039890	-275
ENSBTAG00000004714	-274
ENSBTAG00000000071	-273
ENSBTAG00000004878	-273
ENSBTAG00000007939	-273
ENSBTAG00000009542	-272
ENSBTAG00000003101	-271
ENSBTAG00000003693	-271
ENSBTAG00000007946	-271
ENSBTAG00000019949	-271
ENSBTAG00000003365	-270
ENSBTAG00000003938	-270
ENSBTAG00000007146	-270
ENSBTAG00000017277	-270
ENSBTAG00000018440	-270
ENSBTAG00000019520	-270
ENSBTAG00000037932	-270
ENSBTAG00000031895	-269
ENSBTAG00000044425	-269
ENSBTAG00000012722	-268
ENSBTAG00000039328	-268
ENSBTAG00000039958	-268
ENSBTAG00000004354	-266
ENSBTAG00000006166	-266
ENSBTAG00000006812	-266
ENSBTAG00000007584	-266
ENSBTAG00000009103	-266
ENSBTAG00000011591	-266
ENSBTAG00000013247	-266
ENSBTAG00000015347	-266
ENSBTAG00000019417	-266
ENSBTAG00000047127	-266
ENSBTAG00000002417	-265
ENSBTAG00000005363	-265
ENSBTAG00000011981	-265
ENSBTAG00000042507	-265
ENSBTAG00000044259	-265
ENSBTAG00000047514	-265
ENSBTAG00000005809	-264
ENSBTAG00000010696	-264
ENSBTAG00000013153	-264
ENSBTAG00000021796	-264
ENSBTAG00000004771	-263
ENSBTAG00000009435	-263
ENSBTAG00000011315	-263
ENSBTAG00000018807	-263
ENSBTAG00000048237	-263
ENSBTAG00000002914	-262
ENSBTAG00000015104	-262
ENSBTAG00000019988	-262
ENSBTAG00000042099	-262
ENSBTAG00000010175	-261
ENSBTAG00000005041	-260
ENSBTAG00000021654	-260
ENSBTAG00000034091	-260
ENSBTAG00000046570	-260
ENSBTAG00000009161	-259
ENSBTAG00000009469	-259
ENSBTAG00000012046	-259
ENSBTAG00000014540	-259
ENSBTAG00000014692	-259
ENSBTAG00000021025	-259
ENSBTAG00000035959	-259
ENSBTAG00000043049	-259
ENSBTAG00000047850	-259
ENSBTAG00000002855	-258
ENSBTAG00000014371	-258
ENSBTAG00000015085	-258
ENSBTAG00000017932	-258
ENSBTAG00000018400	-258
ENSBTAG00000030348	-258
ENSBTAG00000001744	-257
ENSBTAG00000006357	-257
ENSBTAG00000009305	-257
ENSBTAG00000013943	-257
ENSBTAG00000015374	-257
ENSBTAG00000021340	-257
ENSBTAG00000025046	-257
ENSBTAG00000047282	-257
ENSBTAG00000006546	-256
ENSBTAG00000008198	-256
ENSBTAG00000013867	-256
ENSBTAG00000024493	-256
ENSBTAG00000030710	-256
ENSBTAG00000003425	-255
ENSBTAG00000005986	-255
ENSBTAG00000018924	-255
ENSBTAG00000020140	-255
ENSBTAG00000046444	-255
ENSBTAG00000001936	-254
ENSBTAG00000008896	-254
ENSBTAG00000019331	-254
ENSBTAG00000042930	-254
ENSBTAG00000008997	-253
ENSBTAG00000010858	-253
ENSBTAG00000020629	-253
ENSBTAG00000021928	-253
ENSBTAG00000014912	-252
ENSBTAG00000025718	-252
ENSBTAG00000039995	-252
ENSBTAG00000012914	-251
ENSBTAG00000020067	-251
ENSBTAG00000024801	-251
ENSBTAG00000042883	-251
ENSBTAG00000001874	-250
ENSBTAG00000004094	-250
ENSBTAG00000007943	-250
ENSBTAG00000009258	-250
ENSBTAG00000014426	-250
ENSBTAG00000015297	-250
ENSBTAG00000045877	-250
ENSBTAG00000044304	-249
ENSBTAG00000009717	-248
ENSBTAG00000015273	-248
ENSBTAG00000018759	-248
ENSBTAG00000034693	-248
ENSBTAG00000003457	-247
ENSBTAG00000007115	-247
ENSBTAG00000009034	-247
ENSBTAG00000014230	-247
ENSBTAG00000031012	-247
ENSBTAG00000002062	-246
ENSBTAG00000005105	-246
ENSBTAG00000006832	-246
ENSBTAG00000007490	-246
ENSBTAG00000008120	-246
ENSBTAG00000015742	-246
ENSBTAG00000016549	-246
ENSBTAG00000027409	-246
ENSBTAG00000046482	-246
ENSBTAG00000047344	-246
ENSBTAG00000006567	-245
ENSBTAG00000014858	-245
ENSBTAG00000016625	-245
ENSBTAG00000021645	-245
ENSBTAG00000024157	-245
ENSBTAG00000033140	-245
ENSBTAG00000045327	-245
ENSBTAG00000000926	-244
ENSBTAG00000002810	-244
ENSBTAG00000005844	-244
ENSBTAG00000008857	-244
ENSBTAG00000012266	-244
ENSBTAG00000016045	-244
ENSBTAG00000019892	-244
ENSBTAG00000021777	-244
ENSBTAG00000031981	-244
ENSBTAG00000040304	-244
ENSBTAG00000044092	-244
ENSBTAG00000003915	-243
ENSBTAG00000010666	-243
ENSBTAG00000011451	-243
ENSBTAG00000027868	-243
ENSBTAG00000005493	-242
ENSBTAG00000006647	-242
ENSBTAG00000011723	-242
ENSBTAG00000013764	-242
ENSBTAG00000021634	-242
ENSBTAG00000039523	-242
ENSBTAG00000010450	-241
ENSBTAG00000019253	-241
ENSBTAG00000020616	-241
ENSBTAG00000000105	-240
ENSBTAG00000017041	-240
ENSBTAG00000018258	-240
ENSBTAG00000022306	-240
ENSBTAG00000038440	-240
ENSBTAG00000006973	-239
ENSBTAG00000007629	-239
ENSBTAG00000025246	-239
ENSBTAG00000004281	-238
ENSBTAG00000005526	-238
ENSBTAG00000007921	-238
ENSBTAG00000007981	-238
ENSBTAG00000017744	-238
ENSBTAG00000048156	-238
ENSBTAG00000010939	-237
ENSBTAG00000017613	-237
ENSBTAG00000021707	-237
ENSBTAG00000010657	-236
ENSBTAG00000017141	-236
ENSBTAG00000019805	-236
ENSBTAG00000029906	-236
ENSBTAG00000037453	-236
ENSBTAG00000042833	-236
ENSBTAG00000046971	-236
ENSBTAG00000016505	-235
ENSBTAG00000016827	-235
ENSBTAG00000029925	-235
ENSBTAG00000042950	-235
ENSBTAG00000006898	-234
ENSBTAG00000011770	-234
ENSBTAG00000015704	-234
ENSBTAG00000020869	-234
ENSBTAG00000020931	-234
ENSBTAG00000032084	-234
ENSBTAG00000047019	-234
ENSBTAG00000002918	-233
ENSBTAG00000004742	-233
ENSBTAG00000006004	-233
ENSBTAG00000016337	-233
ENSBTAG00000020859	-233
ENSBTAG00000024909	-233
ENSBTAG00000044620	-233
ENSBTAG00000045701	-233
ENSBTAG00000046220	-233
ENSBTAG00000006136	-232
ENSBTAG00000008201	-232
ENSBTAG00000012526	-232
ENSBTAG00000015293	-232
ENSBTAG00000016599	-232
ENSBTAG00000026025	-232
ENSBTAG00000008568	-231
ENSBTAG00000017071	-231
ENSBTAG00000027900	-231
bta_miR_30c	-230
ENSBTAG00000004805	-230
ENSBTAG00000006877	-230
ENSBTAG00000007445	-230
ENSBTAG00000008523	-230
ENSBTAG00000023216	-230
ENSBTAG00000034662	-230
ENSBTAG00000042401	-230
ENSBTAG00000007994	-229
ENSBTAG00000008033	-229
ENSBTAG00000009390	-229
ENSBTAG00000010103	-229
ENSBTAG00000013405	-229
ENSBTAG00000014081	-229
ENSBTAG00000015406	-229
ENSBTAG00000006972	-228
ENSBTAG00000013111	-228
ENSBTAG00000019255	-228
ENSBTAG00000019796	-228
ENSBTAG00000039513	-228
ENSBTAG00000045574	-228
ENSBTAG00000007644	-227
ENSBTAG00000010634	-227
ENSBTAG00000011096	-227
ENSBTAG00000017451	-227
ENSBTAG00000017753	-227
ENSBTAG00000017830	-227
ENSBTAG00000018575	-227
ENSBTAG00000003166	-226
ENSBTAG00000003232	-226
ENSBTAG00000006214	-226
ENSBTAG00000013178	-226
ENSBTAG00000017617	-226
ENSBTAG00000019997	-226
ENSBTAG00000020018	-226
ENSBTAG00000020416	-226
ENSBTAG00000007543	-225
ENSBTAG00000008336	-225
ENSBTAG00000018554	-225
ENSBTAG00000021884	-225
ENSBTAG00000032761	-225
ENSBTAG00000047703	-225
ENSBTAG00000008991	-224
ENSBTAG00000011367	-224
ENSBTAG00000019184	-224
ENSBTAG00000038235	-224
ENSBTAG00000001805	-223
ENSBTAG00000006392	-223
ENSBTAG00000009581	-223
ENSBTAG00000010765	-223
ENSBTAG00000015150	-223
ENSBTAG00000017371	-223
ENSBTAG00000018936	-223
ENSBTAG00000040028	-223
ENSBTAG00000046988	-223
ENSBTAG00000048262	-223
ENSBTAG00000000285	-222
ENSBTAG00000001269	-222
ENSBTAG00000005714	-222
ENSBTAG00000014916	-222
ENSBTAG00000016685	-222
ENSBTAG00000040126	-222
ENSBTAG00000042963	-222
ENSBTAG00000000409	-221
ENSBTAG00000006919	-221
ENSBTAG00000014932	-221
ENSBTAG00000021609	-221
ENSBTAG00000000207	-220
ENSBTAG00000000489	-220
ENSBTAG00000004488	-220
ENSBTAG00000012004	-220
ENSBTAG00000013510	-220
ENSBTAG00000016328	-220
ENSBTAG00000023885	-220
ENSBTAG00000023970	-220
ENSBTAG00000031913	-220
ENSBTAG00000035244	-220
ENSBTAG00000039688	-220
ENSBTAG00000042442	-220
ENSBTAG00000000776	-219
ENSBTAG00000001156	-219
ENSBTAG00000007012	-219
ENSBTAG00000008329	-219
ENSBTAG00000017216	-219
ENSBTAG00000018531	-219
ENSBTAG00000000655	-218
ENSBTAG00000001108	-218
ENSBTAG00000003957	-218
ENSBTAG00000007281	-218
ENSBTAG00000021768	-218
ENSBTAG00000048268	-218
ENSBTAG00000000679	-217
ENSBTAG00000006592	-217
ENSBTAG00000009432	-217
ENSBTAG00000010192	-217
ENSBTAG00000001354	-216
ENSBTAG00000007684	-216
ENSBTAG00000010132	-216
ENSBTAG00000021730	-216
ENSBTAG00000024288	-216
ENSBTAG00000030189	-216
ENSBTAG00000033334	-216
ENSBTAG00000044011	-216
ENSBTAG00000046036	-216
ENSBTAG00000000477	-215
ENSBTAG00000003307	-215
ENSBTAG00000004775	-215
ENSBTAG00000007473	-215
ENSBTAG00000010802	-215
ENSBTAG00000020578	-215
ENSBTAG00000021003	-215
ENSBTAG00000042605	-215
ENSBTAG00000046654	-215
ENSBTAG00000002037	-214
ENSBTAG00000008716	-214
ENSBTAG00000010236	-214
ENSBTAG00000012262	-214
ENSBTAG00000017273	-214
ENSBTAG00000019645	-214
ENSBTAG00000021735	-214
ENSBTAG00000038062	-214
ENSBTAG00000040296	-214
ENSBTAG00000043399	-214
ENSBTAG00000000646	-213
ENSBTAG00000001349	-213
ENSBTAG00000002750	-213
ENSBTAG00000004305	-213
ENSBTAG00000005289	-213
ENSBTAG00000010111	-213
ENSBTAG00000010449	-213
ENSBTAG00000010719	-213
ENSBTAG00000012873	-213
ENSBTAG00000013863	-213
ENSBTAG00000017755	-213
ENSBTAG00000019565	-213
ENSBTAG00000026812	-213
ENSBTAG00000026813	-213
ENSBTAG00000042626	-213
ENSBTAG00000044207	-213
ENSBTAG00000009298	-212
ENSBTAG00000016370	-212
ENSBTAG00000017325	-212
ENSBTAG00000021286	-212
ENSBTAG00000025589	-212
ENSBTAG00000045218	-212
ENSBTAG00000001314	-211
ENSBTAG00000006052	-211
ENSBTAG00000009521	-211
ENSBTAG00000010967	-211
ENSBTAG00000011252	-211
ENSBTAG00000013109	-211
ENSBTAG00000019067	-211
bta_miR_136	-210
ENSBTAG00000000642	-210
ENSBTAG00000002493	-210
ENSBTAG00000002646	-210
ENSBTAG00000004086	-210
ENSBTAG00000006538	-210
ENSBTAG00000010206	-210
ENSBTAG00000016746	-210
ENSBTAG00000016775	-210
ENSBTAG00000018356	-210
ENSBTAG00000046668	-210
ENSBTAG00000047467	-210
ENSBTAG00000001346	-209
ENSBTAG00000011154	-209
ENSBTAG00000012436	-209
ENSBTAG00000014456	-209
ENSBTAG00000016107	-209
ENSBTAG00000016735	-209
ENSBTAG00000019152	-209
ENSBTAG00000027983	-209
ENSBTAG00000030432	-209
ENSBTAG00000032591	-209
ENSBTAG00000044884	-209
ENSBTAG00000002680	-208
ENSBTAG00000004187	-208
ENSBTAG00000006029	-208
ENSBTAG00000012703	-208
ENSBTAG00000019819	-208
ENSBTAG00000024869	-208
ENSBTAG00000034998	-208
ENSBTAG00000045306	-208
ENSBTAG00000001279	-207
ENSBTAG00000003626	-207
ENSBTAG00000003786	-207
ENSBTAG00000019028	-207
ENSBTAG00000021595	-207
ENSBTAG00000032493	-207
ENSBTAG00000034411	-207
ENSBTAG00000039530	-207
ENSBTAG00000001246	-206
ENSBTAG00000003074	-206
ENSBTAG00000011398	-206
ENSBTAG00000011872	-206
ENSBTAG00000011873	-206
ENSBTAG00000019416	-206
ENSBTAG00000019602	-206
ENSBTAG00000027557	-206
ENSBTAG00000045910	-206
ENSBTAG00000045934	-206
ENSBTAG00000006150	-205
ENSBTAG00000014975	-205
ENSBTAG00000017837	-205
ENSBTAG00000047069	-205
ENSBTAG00000007437	-204
ENSBTAG00000011217	-204
ENSBTAG00000018379	-204
ENSBTAG00000021273	-204
ENSBTAG00000043263	-204
ENSBTAG00000001904	-203
ENSBTAG00000008603	-203
ENSBTAG00000012955	-203
ENSBTAG00000017715	-203
ENSBTAG00000018248	-203
ENSBTAG00000022960	-203
ENSBTAG00000036287	-203
ENSBTAG00000040132	-203
ENSBTAG00000046041	-203
ENSBTAG00000046104	-203
ENSBTAG00000005951	-202
ENSBTAG00000006447	-202
ENSBTAG00000008719	-202
ENSBTAG00000009055	-202
ENSBTAG00000009336	-202
ENSBTAG00000012541	-202
ENSBTAG00000012838	-202
ENSBTAG00000015901	-202
ENSBTAG00000047281	-202
ENSBTAG00000000576	-201
ENSBTAG00000004659	-201
ENSBTAG00000005965	-201
ENSBTAG00000006743	-201
ENSBTAG00000006757	-201
ENSBTAG00000010850	-201
ENSBTAG00000013369	-201
ENSBTAG00000018372	-201
ENSBTAG00000020391	-201
ENSBTAG00000027453	-201
ENSBTAG00000031711	-201
ENSBTAG00000006683	-200
ENSBTAG00000008708	-200
ENSBTAG00000017844	-200
ENSBTAG00000039380	-200
ENSBTAG00000000616	-199
ENSBTAG00000005077	-199
ENSBTAG00000007588	-199
ENSBTAG00000015872	-199
ENSBTAG00000018211	-199
ENSBTAG00000019282	-199
ENSBTAG00000021781	-199
ENSBTAG00000031906	-199
ENSBTAG00000037649	-199
ENSBTAG00000047743	-199
bta_miR_145	-198
ENSBTAG00000000251	-198
ENSBTAG00000005207	-198
ENSBTAG00000012621	-198
ENSBTAG00000013744	-198
ENSBTAG00000017243	-198
ENSBTAG00000044942	-198
ENSBTAG00000001350	-197
ENSBTAG00000002472	-197
ENSBTAG00000004179	-197
ENSBTAG00000015493	-197
ENSBTAG00000018352	-197
ENSBTAG00000019225	-197
ENSBTAG00000043036	-197
ENSBTAG00000044702	-197
ENSBTAG00000046129	-197
ENSBTAG00000046953	-197
ENSBTAG00000002297	-196
ENSBTAG00000002635	-196
ENSBTAG00000004147	-196
ENSBTAG00000013717	-196
ENSBTAG00000015791	-196
ENSBTAG00000016274	-196
ENSBTAG00000021913	-196
ENSBTAG00000038974	-196
ENSBTAG00000039556	-196
ENSBTAG00000044115	-196
ENSBTAG00000004745	-195
ENSBTAG00000014286	-195
ENSBTAG00000039014	-195
ENSBTAG00000000057	-194
ENSBTAG00000000394	-194
ENSBTAG00000005855	-194
ENSBTAG00000009251	-194
ENSBTAG00000009868	-194
ENSBTAG00000015304	-194
ENSBTAG00000020027	-194
ENSBTAG00000038461	-194
ENSBTAG00000000490	-193
ENSBTAG00000003394	-193
ENSBTAG00000003515	-193
ENSBTAG00000005038	-193
ENSBTAG00000006419	-193
ENSBTAG00000009585	-193
ENSBTAG00000009736	-193
ENSBTAG00000014665	-193
bta_miR_365_5p	-192
ENSBTAG00000003719	-192
ENSBTAG00000004693	-192
ENSBTAG00000007193	-192
ENSBTAG00000008584	-192
ENSBTAG00000010970	-192
ENSBTAG00000012132	-192
ENSBTAG00000016072	-192
bta_miR_486	-191
ENSBTAG00000000582	-191
ENSBTAG00000003501	-191
ENSBTAG00000014146	-191
ENSBTAG00000014374	-191
ENSBTAG00000014435	-191
ENSBTAG00000014995	-191
ENSBTAG00000022783	-191
ENSBTAG00000038438	-191
ENSBTAG00000004625	-190
ENSBTAG00000006474	-190
ENSBTAG00000011224	-190
ENSBTAG00000013260	-190
ENSBTAG00000020345	-190
ENSBTAG00000025200	-190
ENSBTAG00000027064	-190
ENSBTAG00000039406	-190
ENSBTAG00000012749	-189
ENSBTAG00000013378	-189
ENSBTAG00000014177	-189
ENSBTAG00000015735	-189
ENSBTAG00000018133	-189
ENSBTAG00000018543	-189
ENSBTAG00000023146	-189
ENSBTAG00000039049	-189
ENSBTAG00000042775	-189
ENSBTAG00000008382	-188
ENSBTAG00000010991	-188
ENSBTAG00000032031	-188
ENSBTAG00000037578	-188
ENSBTAG00000005723	-187
ENSBTAG00000014848	-187
ENSBTAG00000018326	-187
ENSBTAG00000019652	-187
ENSBTAG00000024204	-187
ENSBTAG00000042440	-187
ENSBTAG00000046703	-187
ENSBTAG00000048287	-187
ENSBTAG00000007678	-186
ENSBTAG00000010304	-186
ENSBTAG00000011359	-186
ENSBTAG00000018904	-186
ENSBTAG00000019375	-186
ENSBTAG00000037381	-186
ENSBTAG00000000551	-185
ENSBTAG00000001365	-185
ENSBTAG00000012382	-185
ENSBTAG00000014502	-185
ENSBTAG00000020962	-185
ENSBTAG00000029926	-185
ENSBTAG00000032819	-185
ENSBTAG00000039770	-185
ENSBTAG00000000301	-184
ENSBTAG00000001131	-184
ENSBTAG00000001603	-184
ENSBTAG00000005119	-184
ENSBTAG00000010882	-184
ENSBTAG00000016679	-184
ENSBTAG00000019628	-184
ENSBTAG00000021731	-184
ENSBTAG00000021993	-184
ENSBTAG00000034824	-184
ENSBTAG00000046768	-184
ENSBTAG00000003180	-183
ENSBTAG00000003671	-183
ENSBTAG00000004926	-183
ENSBTAG00000011374	-183
ENSBTAG00000015336	-183
ENSBTAG00000018402	-183
ENSBTAG00000019940	-183
ENSBTAG00000020736	-183
ENSBTAG00000024983	-183
ENSBTAG00000042335	-183
ENSBTAG00000043402	-183
ENSBTAG00000043530	-183
ENSBTAG00000045572	-183
ENSBTAG00000046701	-183
ENSBTAG00000000439	-182
ENSBTAG00000001082	-182
ENSBTAG00000006369	-182
ENSBTAG00000011146	-182
ENSBTAG00000012403	-182
ENSBTAG00000012759	-182
ENSBTAG00000019332	-182
ENSBTAG00000021974	-182
ENSBTAG00000032200	-182
ENSBTAG00000037996	-182
ENSBTAG00000046173	-182
ENSBTAG00000000099	-181
ENSBTAG00000001981	-181
ENSBTAG00000003842	-181
ENSBTAG00000008035	-181
ENSBTAG00000010786	-181
ENSBTAG00000015148	-181
ENSBTAG00000015694	-181
ENSBTAG00000019115	-181
ENSBTAG00000021809	-181
ENSBTAG00000046339	-181
ENSBTAG00000048101	-181
ENSBTAG00000000564	-180
ENSBTAG00000004484	-180
ENSBTAG00000004945	-180
ENSBTAG00000012861	-180
ENSBTAG00000014813	-180
ENSBTAG00000018205	-180
ENSBTAG00000018642	-180
ENSBTAG00000032996	-180
ENSBTAG00000047582	-180
ENSBTAG00000006235	-179
ENSBTAG00000014324	-179
ENSBTAG00000024379	-179
ENSBTAG00000043166	-179
ENSBTAG00000045711	-179
ENSBTAG00000046066	-179
ENSBTAG00000047642	-179
ENSBTAG00000001376	-178
ENSBTAG00000001945	-178
ENSBTAG00000002178	-178
ENSBTAG00000002464	-178
ENSBTAG00000010837	-178
ENSBTAG00000018363	-178
ENSBTAG00000023971	-178
ENSBTAG00000001712	-177
ENSBTAG00000003547	-177
ENSBTAG00000005795	-177
ENSBTAG00000006030	-177
ENSBTAG00000006233	-177
ENSBTAG00000011244	-177
ENSBTAG00000012628	-177
ENSBTAG00000012761	-177
ENSBTAG00000014585	-177
ENSBTAG00000018707	-177
ENSBTAG00000019027	-177
ENSBTAG00000021521	-177
ENSBTAG00000023529	-177
ENSBTAG00000025424	-177
ENSBTAG00000031018	-177
ENSBTAG00000032518	-177
ENSBTAG00000033396	-177
ENSBTAG00000007047	-176
ENSBTAG00000007388	-176
ENSBTAG00000008362	-176
ENSBTAG00000012150	-176
ENSBTAG00000013698	-176
ENSBTAG00000015171	-176
ENSBTAG00000018616	-176
ENSBTAG00000032640	-176
ENSBTAG00000047944	-176
ENSBTAG00000048118	-176
ENSBTAG00000008978	-175
ENSBTAG00000012990	-175
ENSBTAG00000016320	-175
ENSBTAG00000018064	-175
ENSBTAG00000020097	-175
ENSBTAG00000031658	-175
ENSBTAG00000035370	-175
ENSBTAG00000038233	-175
ENSBTAG00000040521	-175
ENSBTAG00000002194	-174
ENSBTAG00000005063	-174
ENSBTAG00000006054	-174
ENSBTAG00000009836	-174
ENSBTAG00000010689	-174
ENSBTAG00000013010	-174
ENSBTAG00000013301	-174
ENSBTAG00000014255	-174
ENSBTAG00000016575	-174
ENSBTAG00000022986	-174
ENSBTAG00000030483	-174
ENSBTAG00000040098	-174
ENSBTAG00000043350	-174
ENSBTAG00000015027	-173
ENSBTAG00000015961	-173
ENSBTAG00000020055	-173
ENSBTAG00000021568	-173
ENSBTAG00000030222	-173
ENSBTAG00000002267	-172
ENSBTAG00000007239	-172
ENSBTAG00000012376	-172
ENSBTAG00000012719	-172
ENSBTAG00000012816	-172
ENSBTAG00000018192	-172
ENSBTAG00000019414	-172
ENSBTAG00000019885	-172
ENSBTAG00000030749	-172
ENSBTAG00000032152	-172
ENSBTAG00000038878	-172
ENSBTAG00000039738	-172
ENSBTAG00000040384	-172
ENSBTAG00000000371	-171
ENSBTAG00000012518	-171
ENSBTAG00000013249	-171
ENSBTAG00000014982	-171
ENSBTAG00000016163	-171
ENSBTAG00000021427	-171
ENSBTAG00000039499	-171
bta_miR_3613a	-170
ENSBTAG00000000413	-170
ENSBTAG00000000654	-170
ENSBTAG00000001845	-170
ENSBTAG00000006243	-170
ENSBTAG00000012994	-170
ENSBTAG00000021984	-170
ENSBTAG00000031481	-170
ENSBTAG00000031701	-170
ENSBTAG00000042377	-170
ENSBTAG00000045623	-170
bta_miR_20a	-169
ENSBTAG00000002928	-169
ENSBTAG00000003923	-169
ENSBTAG00000006366	-169
ENSBTAG00000006676	-169
ENSBTAG00000008621	-169
ENSBTAG00000011986	-169
ENSBTAG00000012156	-169
ENSBTAG00000014521	-169
ENSBTAG00000017104	-169
ENSBTAG00000020225	-169
ENSBTAG00000021103	-169
ENSBTAG00000033333	-169
ENSBTAG00000040169	-169
ENSBTAG00000043957	-169
ENSBTAG00000001481	-168
ENSBTAG00000002185	-168
ENSBTAG00000004582	-168
ENSBTAG00000006920	-168
ENSBTAG00000015363	-168
ENSBTAG00000017157	-168
ENSBTAG00000018019	-168
ENSBTAG00000019894	-168
ENSBTAG00000027513	-168
ENSBTAG00000038879	-168
ENSBTAG00000046941	-168
ENSBTAG00000003060	-167
ENSBTAG00000004676	-167
ENSBTAG00000007331	-167
ENSBTAG00000010505	-167
ENSBTAG00000010934	-167
ENSBTAG00000010948	-167
ENSBTAG00000015218	-167
ENSBTAG00000022471	-167
ENSBTAG00000045887	-167
ENSBTAG00000047602	-167
ENSBTAG00000005416	-166
ENSBTAG00000011387	-166
ENSBTAG00000017913	-166
ENSBTAG00000018557	-166
ENSBTAG00000022137	-166
ENSBTAG00000038263	-166
ENSBTAG00000040053	-166
ENSBTAG00000003531	-165
ENSBTAG00000003629	-165
ENSBTAG00000005937	-165
ENSBTAG00000009737	-165
ENSBTAG00000011757	-165
ENSBTAG00000011828	-165
ENSBTAG00000012878	-165
ENSBTAG00000017075	-165
ENSBTAG00000019828	-165
ENSBTAG00000020664	-165
ENSBTAG00000034442	-165
ENSBTAG00000035083	-165
ENSBTAG00000038541	-165
ENSBTAG00000043992	-165
ENSBTAG00000044175	-165
ENSBTAG00000002272	-164
ENSBTAG00000005120	-164
ENSBTAG00000005828	-164
ENSBTAG00000005994	-164
ENSBTAG00000011866	-164
ENSBTAG00000012016	-164
ENSBTAG00000021173	-164
ENSBTAG00000022128	-164
ENSBTAG00000044112	-164
ENSBTAG00000047250	-164
ENSBTAG00000048085	-164
ENSBTAG00000001250	-163
ENSBTAG00000002240	-163
ENSBTAG00000006417	-163
ENSBTAG00000009599	-163
ENSBTAG00000009822	-163
ENSBTAG00000011883	-163
ENSBTAG00000015326	-163
ENSBTAG00000018427	-163
ENSBTAG00000019516	-163
ENSBTAG00000019536	-163
ENSBTAG00000021342	-163
ENSBTAG00000026604	-163
ENSBTAG00000030369	-163
ENSBTAG00000030960	-163
ENSBTAG00000044080	-163
ENSBTAG00000000240	-162
ENSBTAG00000003193	-162
ENSBTAG00000004371	-162
ENSBTAG00000013662	-162
ENSBTAG00000018239	-162
ENSBTAG00000024947	-162
ENSBTAG00000030711	-162
ENSBTAG00000038043	-162
bta_miR_484	-161
ENSBTAG00000001244	-161
ENSBTAG00000002206	-161
ENSBTAG00000005033	-161
ENSBTAG00000006108	-161
ENSBTAG00000011127	-161
ENSBTAG00000012321	-161
ENSBTAG00000014693	-161
ENSBTAG00000019266	-161
ENSBTAG00000019568	-161
ENSBTAG00000020444	-161
ENSBTAG00000040334	-161
ENSBTAG00000044862	-161
ENSBTAG00000000917	-160
ENSBTAG00000004297	-160
ENSBTAG00000006339	-160
ENSBTAG00000010579	-160
ENSBTAG00000015856	-160
ENSBTAG00000016857	-160
ENSBTAG00000021935	-160
ENSBTAG00000023697	-160
ENSBTAG00000027728	-160
ENSBTAG00000044956	-160
ENSBTAG00000047649	-160
bta_miR_26b	-159
ENSBTAG00000014093	-159
ENSBTAG00000018224	-159
ENSBTAG00000038298	-159
ENSBTAG00000043165	-159
ENSBTAG00000000124	-158
ENSBTAG00000005456	-158
ENSBTAG00000007485	-158
ENSBTAG00000011150	-158
ENSBTAG00000012139	-158
ENSBTAG00000015776	-158
ENSBTAG00000024482	-158
ENSBTAG00000029970	-158
ENSBTAG00000037377	-158
ENSBTAG00000001143	-157
ENSBTAG00000001572	-157
ENSBTAG00000002354	-157
ENSBTAG00000004097	-157
ENSBTAG00000005337	-157
ENSBTAG00000006722	-157
ENSBTAG00000007139	-157
ENSBTAG00000010020	-157
ENSBTAG00000010774	-157
ENSBTAG00000011720	-157
ENSBTAG00000012774	-157
ENSBTAG00000013537	-157
ENSBTAG00000015351	-157
ENSBTAG00000018193	-157
ENSBTAG00000020133	-157
ENSBTAG00000020989	-157
ENSBTAG00000023032	-157
bta_miR_574	-156
ENSBTAG00000001188	-156
ENSBTAG00000001199	-156
ENSBTAG00000007247	-156
ENSBTAG00000007732	-156
ENSBTAG00000007931	-156
ENSBTAG00000008144	-156
ENSBTAG00000008147	-156
ENSBTAG00000011457	-156
ENSBTAG00000013611	-156
ENSBTAG00000014554	-156
ENSBTAG00000016263	-156
ENSBTAG00000016514	-156
ENSBTAG00000016637	-156
ENSBTAG00000018795	-156
ENSBTAG00000019761	-156
ENSBTAG00000029957	-156
ENSBTAG00000039682	-156
bta_miR_374a	-155
bta_miR_660	-155
ENSBTAG00000000039	-155
ENSBTAG00000001150	-155
ENSBTAG00000003467	-155
ENSBTAG00000003711	-155
ENSBTAG00000005263	-155
ENSBTAG00000011579	-155
ENSBTAG00000012830	-155
ENSBTAG00000014758	-155
ENSBTAG00000015377	-155
ENSBTAG00000017565	-155
ENSBTAG00000031598	-155
ENSBTAG00000043394	-155
ENSBTAG00000001675	-154
ENSBTAG00000003971	-154
ENSBTAG00000005895	-154
ENSBTAG00000006639	-154
ENSBTAG00000011461	-154
ENSBTAG00000017405	-154
ENSBTAG00000019371	-154
ENSBTAG00000020373	-154
ENSBTAG00000027936	-154
ENSBTAG00000037595	-154
ENSBTAG00000046601	-154
ENSBTAG00000046797	-154
ENSBTAG00000006765	-153
ENSBTAG00000008441	-153
ENSBTAG00000014396	-153
ENSBTAG00000015879	-153
ENSBTAG00000020611	-153
ENSBTAG00000035705	-153
ENSBTAG00000038783	-153
bta_miR_125a	-152
bta_miR_215	-152
ENSBTAG00000004018	-152
ENSBTAG00000006821	-152
ENSBTAG00000011052	-152
ENSBTAG00000013451	-152
ENSBTAG00000019852	-152
ENSBTAG00000022571	-152
ENSBTAG00000038756	-152
ENSBTAG00000038823	-152
ENSBTAG00000045602	-152
ENSBTAG00000048011	-152
ENSBTAG00000010225	-151
ENSBTAG00000017465	-151
ENSBTAG00000019303	-151
ENSBTAG00000033803	-151
ENSBTAG00000039391	-151
ENSBTAG00000039981	-151
ENSBTAG00000046420	-151
ENSBTAG00000047378	-151
ENSBTAG00000001932	-150
ENSBTAG00000002477	-150
ENSBTAG00000002809	-150
ENSBTAG00000004462	-150
ENSBTAG00000005971	-150
ENSBTAG00000008626	-150
ENSBTAG00000009421	-150
ENSBTAG00000013138	-150
ENSBTAG00000015280	-150
ENSBTAG00000021447	-150
ENSBTAG00000032059	-150
ENSBTAG00000044614	-150
ENSBTAG00000047611	-150
ENSBTAG00000000359	-149
ENSBTAG00000007654	-149
ENSBTAG00000007816	-149
ENSBTAG00000007843	-149
ENSBTAG00000010355	-149
ENSBTAG00000011862	-149
ENSBTAG00000014091	-149
ENSBTAG00000021444	-149
ENSBTAG00000030557	-149
ENSBTAG00000045678	-149
ENSBTAG00000046666	-149
ENSBTAG00000047083	-149
ENSBTAG00000002458	-148
ENSBTAG00000005431	-148
ENSBTAG00000008952	-148
ENSBTAG00000012508	-148
ENSBTAG00000016973	-148
ENSBTAG00000020418	-148
ENSBTAG00000021525	-148
ENSBTAG00000022880	-148
ENSBTAG00000023787	-148
ENSBTAG00000024545	-148
ENSBTAG00000029994	-148
ENSBTAG00000033413	-148
ENSBTAG00000000792	-147
ENSBTAG00000003766	-147
ENSBTAG00000008236	-147
ENSBTAG00000017436	-147
ENSBTAG00000018580	-147
ENSBTAG00000027159	-147
ENSBTAG00000030885	-147
ENSBTAG00000033891	-147
ENSBTAG00000039256	-147
ENSBTAG00000046733	-147
ENSBTAG00000003668	-146
ENSBTAG00000004495	-146
ENSBTAG00000011209	-146
ENSBTAG00000014192	-146
ENSBTAG00000016338	-146
ENSBTAG00000016821	-146
ENSBTAG00000038238	-146
ENSBTAG00000046878	-146
ENSBTAG00000000951	-145
ENSBTAG00000008138	-145
ENSBTAG00000010442	-145
ENSBTAG00000012817	-145
ENSBTAG00000012847	-145
ENSBTAG00000015290	-145
ENSBTAG00000015615	-145
ENSBTAG00000016438	-145
ENSBTAG00000018770	-145
ENSBTAG00000019347	-145
ENSBTAG00000019913	-145
ENSBTAG00000033961	-145
ENSBTAG00000034033	-145
ENSBTAG00000043776	-145
ENSBTAG00000047287	-145
ENSBTAG00000002025	-144
ENSBTAG00000002845	-144
ENSBTAG00000005997	-144
ENSBTAG00000006157	-144
ENSBTAG00000009176	-144
ENSBTAG00000009195	-144
ENSBTAG00000019772	-144
ENSBTAG00000020760	-144
ENSBTAG00000042744	-144
ENSBTAG00000042780	-144
ENSBTAG00000001000	-143
ENSBTAG00000002488	-143
ENSBTAG00000006659	-143
ENSBTAG00000007660	-143
ENSBTAG00000008032	-143
ENSBTAG00000012007	-143
ENSBTAG00000015527	-143
ENSBTAG00000019265	-143
ENSBTAG00000038090	-143
ENSBTAG00000039491	-143
ENSBTAG00000043959	-143
ENSBTAG00000044225	-143
ENSBTAG00000044427	-143
ENSBTAG00000011395	-142
ENSBTAG00000012608	-142
ENSBTAG00000014804	-142
ENSBTAG00000015596	-142
ENSBTAG00000016666	-142
ENSBTAG00000017222	-142
ENSBTAG00000017948	-142
ENSBTAG00000018812	-142
ENSBTAG00000024443	-142
ENSBTAG00000044208	-142
ENSBTAG00000044891	-142
ENSBTAG00000048002	-142
ENSBTAG00000001235	-141
ENSBTAG00000001356	-141
ENSBTAG00000009392	-141
ENSBTAG00000012390	-141
ENSBTAG00000018978	-141
ENSBTAG00000018981	-141
ENSBTAG00000020491	-141
ENSBTAG00000025226	-141
ENSBTAG00000027434	-141
ENSBTAG00000038258	-141
ENSBTAG00000039129	-141
ENSBTAG00000000791	-140
ENSBTAG00000003078	-140
ENSBTAG00000004735	-140
ENSBTAG00000006019	-140
ENSBTAG00000008932	-140
ENSBTAG00000010185	-140
ENSBTAG00000010196	-140
ENSBTAG00000011668	-140
ENSBTAG00000012609	-140
ENSBTAG00000014087	-140
ENSBTAG00000015917	-140
ENSBTAG00000018237	-140
ENSBTAG00000018703	-140
ENSBTAG00000018926	-140
ENSBTAG00000039442	-140
ENSBTAG00000046118	-140
ENSBTAG00000002024	-139
ENSBTAG00000004114	-139
ENSBTAG00000006438	-139
ENSBTAG00000009786	-139
ENSBTAG00000012192	-139
ENSBTAG00000013085	-139
ENSBTAG00000013330	-139
ENSBTAG00000013357	-139
ENSBTAG00000015268	-139
ENSBTAG00000016199	-139
ENSBTAG00000017361	-139
ENSBTAG00000018991	-139
ENSBTAG00000019577	-139
ENSBTAG00000019726	-139
ENSBTAG00000030366	-139
ENSBTAG00000033214	-139
ENSBTAG00000039426	-139
ENSBTAG00000043098	-139
ENSBTAG00000001186	-138
ENSBTAG00000004388	-138
ENSBTAG00000006268	-138
ENSBTAG00000006520	-138
ENSBTAG00000009106	-138
ENSBTAG00000010742	-138
ENSBTAG00000012623	-138
ENSBTAG00000017251	-138
ENSBTAG00000018240	-138
ENSBTAG00000018284	-138
ENSBTAG00000019322	-138
ENSBTAG00000029237	-138
ENSBTAG00000030533	-138
ENSBTAG00000032686	-138
bta_miR_3431	-137
ENSBTAG00000000281	-137
ENSBTAG00000005815	-137
ENSBTAG00000005979	-137
ENSBTAG00000006620	-137
ENSBTAG00000014960	-137
ENSBTAG00000015267	-137
ENSBTAG00000016305	-137
ENSBTAG00000020236	-137
ENSBTAG00000021223	-137
ENSBTAG00000021287	-137
ENSBTAG00000026290	-137
ENSBTAG00000045789	-137
ENSBTAG00000001817	-136
ENSBTAG00000003508	-136
ENSBTAG00000003941	-136
ENSBTAG00000003962	-136
ENSBTAG00000015825	-136
ENSBTAG00000016711	-136
ENSBTAG00000017561	-136
ENSBTAG00000018777	-136
ENSBTAG00000019593	-136
ENSBTAG00000019870	-136
ENSBTAG00000030162	-136
ENSBTAG00000030672	-136
ENSBTAG00000047764	-136
ENSBTAG00000001400	-135
ENSBTAG00000001629	-135
ENSBTAG00000002259	-135
ENSBTAG00000002296	-135
ENSBTAG00000008424	-135
ENSBTAG00000010303	-135
ENSBTAG00000011243	-135
ENSBTAG00000016826	-135
ENSBTAG00000019029	-135
ENSBTAG00000020809	-135
ENSBTAG00000027321	-135
ENSBTAG00000048121	-135
ENSBTAG00000009488	-134
ENSBTAG00000010337	-134
ENSBTAG00000010758	-134
ENSBTAG00000012447	-134
ENSBTAG00000013541	-134
ENSBTAG00000013766	-134
ENSBTAG00000014122	-134
ENSBTAG00000016944	-134
ENSBTAG00000023563	-134
ENSBTAG00000026234	-134
ENSBTAG00000039186	-134
bta_miR_150	-133
ENSBTAG00000004729	-133
ENSBTAG00000005830	-133
ENSBTAG00000011602	-133
ENSBTAG00000013134	-133
ENSBTAG00000014992	-133
ENSBTAG00000016399	-133
ENSBTAG00000020332	-133
ENSBTAG00000021368	-133
ENSBTAG00000038896	-133
ENSBTAG00000043377	-133
ENSBTAG00000047712	-133
ENSBTAG00000000435	-132
ENSBTAG00000001694	-132
ENSBTAG00000003682	-132
ENSBTAG00000006940	-132
ENSBTAG00000008737	-132
ENSBTAG00000014465	-132
ENSBTAG00000015044	-132
ENSBTAG00000016249	-132
ENSBTAG00000019712	-132
ENSBTAG00000019904	-132
ENSBTAG00000046662	-132
ENSBTAG00000046839	-132
ENSBTAG00000046857	-132
ENSBTAG00000046928	-132
ENSBTAG00000047128	-132
bta_miR_181c	-131
ENSBTAG00000000693	-131
ENSBTAG00000001233	-131
ENSBTAG00000003261	-131
ENSBTAG00000004082	-131
ENSBTAG00000005868	-131
ENSBTAG00000006938	-131
ENSBTAG00000007648	-131
ENSBTAG00000007875	-131
ENSBTAG00000012103	-131
ENSBTAG00000013205	-131
ENSBTAG00000021876	-131
ENSBTAG00000022067	-131
ENSBTAG00000027635	-131
ENSBTAG00000031595	-131
ENSBTAG00000032206	-131
ENSBTAG00000034503	-131
ENSBTAG00000038845	-131
ENSBTAG00000038854	-131
ENSBTAG00000042256	-131
ENSBTAG00000045976	-131
ENSBTAG00000003458	-130
ENSBTAG00000006355	-130
ENSBTAG00000006494	-130
ENSBTAG00000006591	-130
ENSBTAG00000011083	-130
ENSBTAG00000015009	-130
ENSBTAG00000017551	-130
ENSBTAG00000020056	-130
ENSBTAG00000034138	-130
ENSBTAG00000034433	-130
ENSBTAG00000038322	-130
ENSBTAG00000046363	-130
ENSBTAG00000000274	-129
ENSBTAG00000000357	-129
ENSBTAG00000003699	-129
ENSBTAG00000004440	-129
ENSBTAG00000004834	-129
ENSBTAG00000009125	-129
ENSBTAG00000011910	-129
ENSBTAG00000014574	-129
ENSBTAG00000016723	-129
ENSBTAG00000020793	-129
ENSBTAG00000021102	-129
ENSBTAG00000021798	-129
ENSBTAG00000030423	-129
ENSBTAG00000042368	-129
ENSBTAG00000043158	-129
ENSBTAG00000043373	-129
bta_miR_26a	-128
ENSBTAG00000000144	-128
ENSBTAG00000007698	-128
ENSBTAG00000008507	-128
ENSBTAG00000009199	-128
ENSBTAG00000011139	-128
ENSBTAG00000012787	-128
ENSBTAG00000015210	-128
ENSBTAG00000015338	-128
ENSBTAG00000016122	-128
ENSBTAG00000019246	-128
ENSBTAG00000020409	-128
ENSBTAG00000023614	-128
ENSBTAG00000030994	-128
ENSBTAG00000034147	-128
ENSBTAG00000038375	-128
ENSBTAG00000042447	-128
ENSBTAG00000001824	-127
ENSBTAG00000004126	-127
ENSBTAG00000005476	-127
ENSBTAG00000011000	-127
ENSBTAG00000012848	-127
ENSBTAG00000012855	-127
ENSBTAG00000015891	-127
ENSBTAG00000016152	-127
ENSBTAG00000018845	-127
ENSBTAG00000019663	-127
ENSBTAG00000026172	-127
bta_miR_30d	-126
ENSBTAG00000001570	-126
ENSBTAG00000006572	-126
ENSBTAG00000008350	-126
ENSBTAG00000011412	-126
ENSBTAG00000013959	-126
ENSBTAG00000020798	-126
ENSBTAG00000025848	-126
ENSBTAG00000033460	-126
ENSBTAG00000046175	-126
ENSBTAG00000047412	-126
bta_miR_23b_3p	-125
ENSBTAG00000001305	-125
ENSBTAG00000004273	-125
ENSBTAG00000004930	-125
ENSBTAG00000006566	-125
ENSBTAG00000008946	-125
ENSBTAG00000012979	-125
ENSBTAG00000013653	-125
ENSBTAG00000016534	-125
ENSBTAG00000016607	-125
ENSBTAG00000019315	-125
ENSBTAG00000019808	-125
ENSBTAG00000021214	-125
ENSBTAG00000021522	-125
ENSBTAG00000027464	-125
ENSBTAG00000031725	-125
ENSBTAG00000037634	-125
ENSBTAG00000046871	-125
ENSBTAG00000047670	-125
ENSBTAG00000047747	-125
bta_miR_411c_5p	-124
ENSBTAG00000000684	-124
ENSBTAG00000002226	-124
ENSBTAG00000002719	-124
ENSBTAG00000005344	-124
ENSBTAG00000006804	-124
ENSBTAG00000007092	-124
ENSBTAG00000008707	-124
ENSBTAG00000011425	-124
ENSBTAG00000015046	-124
ENSBTAG00000016640	-124
ENSBTAG00000017038	-124
ENSBTAG00000047226	-124
ENSBTAG00000000588	-123
ENSBTAG00000000804	-123
ENSBTAG00000001503	-123
ENSBTAG00000004553	-123
ENSBTAG00000005852	-123
ENSBTAG00000006140	-123
ENSBTAG00000007606	-123
ENSBTAG00000008307	-123
ENSBTAG00000009152	-123
ENSBTAG00000010171	-123
ENSBTAG00000011482	-123
ENSBTAG00000020093	-123
ENSBTAG00000024663	-123
ENSBTAG00000024991	-123
ENSBTAG00000040473	-123
ENSBTAG00000046776	-123
bta_miR_7	-122
ENSBTAG00000003361	-122
ENSBTAG00000006894	-122
ENSBTAG00000007108	-122
ENSBTAG00000007357	-122
ENSBTAG00000009037	-122
ENSBTAG00000009514	-122
ENSBTAG00000009959	-122
ENSBTAG00000011786	-122
ENSBTAG00000014529	-122
ENSBTAG00000014768	-122
ENSBTAG00000016876	-122
ENSBTAG00000019399	-122
ENSBTAG00000020844	-122
ENSBTAG00000039012	-122
ENSBTAG00000045566	-122
ENSBTAG00000046000	-122
bta_miR_432	-121
ENSBTAG00000001464	-121
ENSBTAG00000004178	-121
ENSBTAG00000004337	-121
ENSBTAG00000004674	-121
ENSBTAG00000005104	-121
ENSBTAG00000010788	-121
ENSBTAG00000011782	-121
ENSBTAG00000014897	-121
ENSBTAG00000015208	-121
ENSBTAG00000018806	-121
ENSBTAG00000019563	-121
ENSBTAG00000020199	-121
ENSBTAG00000020238	-121
ENSBTAG00000039353	-121
ENSBTAG00000043378	-121
ENSBTAG00000002865	-120
ENSBTAG00000004038	-120
ENSBTAG00000005708	-120
ENSBTAG00000006410	-120
ENSBTAG00000009396	-120
ENSBTAG00000009978	-120
ENSBTAG00000010096	-120
ENSBTAG00000010602	-120
ENSBTAG00000010623	-120
ENSBTAG00000010717	-120
ENSBTAG00000011088	-120
ENSBTAG00000014391	-120
ENSBTAG00000016291	-120
ENSBTAG00000019585	-120
ENSBTAG00000019783	-120
ENSBTAG00000019859	-120
ENSBTAG00000020232	-120
ENSBTAG00000021829	-120
ENSBTAG00000030979	-120
ENSBTAG00000031401	-120
ENSBTAG00000035660	-120
ENSBTAG00000040406	-120
ENSBTAG00000044190	-120
ENSBTAG00000047482	-120
ENSBTAG00000048274	-120
bta_miR_1468	-119
ENSBTAG00000002104	-119
ENSBTAG00000004378	-119
ENSBTAG00000006088	-119
ENSBTAG00000009518	-119
ENSBTAG00000014075	-119
ENSBTAG00000016591	-119
ENSBTAG00000018639	-119
ENSBTAG00000020286	-119
ENSBTAG00000020467	-119
ENSBTAG00000020880	-119
ENSBTAG00000021157	-119
ENSBTAG00000030882	-119
ENSBTAG00000036298	-119
ENSBTAG00000042378	-119
ENSBTAG00000043531	-119
ENSBTAG00000045060	-119
ENSBTAG00000046854	-119
ENSBTAG00000002697	-118
ENSBTAG00000003038	-118
ENSBTAG00000007693	-118
ENSBTAG00000009558	-118
ENSBTAG00000009701	-118
ENSBTAG00000011621	-118
ENSBTAG00000012219	-118
ENSBTAG00000014259	-118
ENSBTAG00000017085	-118
ENSBTAG00000017814	-118
ENSBTAG00000018690	-118
ENSBTAG00000019557	-118
ENSBTAG00000022373	-118
ENSBTAG00000043972	-118
ENSBTAG00000046031	-118
ENSBTAG00000046377	-118
ENSBTAG00000047749	-118
ENSBTAG00000047794	-118
bta_miR_423_5p	-117
bta_miR_6123	-117
ENSBTAG00000000238	-117
ENSBTAG00000001412	-117
ENSBTAG00000001589	-117
ENSBTAG00000001717	-117
ENSBTAG00000001803	-117
ENSBTAG00000002211	-117
ENSBTAG00000003017	-117
ENSBTAG00000006069	-117
ENSBTAG00000006162	-117
ENSBTAG00000009338	-117
ENSBTAG00000010573	-117
ENSBTAG00000013030	-117
ENSBTAG00000015482	-117
ENSBTAG00000017766	-117
ENSBTAG00000018833	-117
ENSBTAG00000021943	-117
ENSBTAG00000029857	-117
ENSBTAG00000038617	-117
ENSBTAG00000001391	-116
ENSBTAG00000001882	-116
ENSBTAG00000007920	-116
ENSBTAG00000007990	-116
ENSBTAG00000018127	-116
ENSBTAG00000019462	-116
ENSBTAG00000021165	-116
ENSBTAG00000024091	-116
ENSBTAG00000032405	-116
ENSBTAG00000033254	-116
ENSBTAG00000036113	-116
ENSBTAG00000040082	-116
ENSBTAG00000046265	-116
bta_miR_769	-115
ENSBTAG00000002844	-115
ENSBTAG00000002940	-115
ENSBTAG00000003381	-115
ENSBTAG00000003601	-115
ENSBTAG00000004342	-115
ENSBTAG00000004498	-115
ENSBTAG00000005682	-115
ENSBTAG00000006523	-115
ENSBTAG00000010549	-115
ENSBTAG00000013638	-115
ENSBTAG00000015919	-115
ENSBTAG00000017504	-115
ENSBTAG00000022058	-115
ENSBTAG00000030890	-115
ENSBTAG00000032947	-115
ENSBTAG00000037821	-115
ENSBTAG00000038240	-115
ENSBTAG00000039658	-115
ENSBTAG00000039904	-115
ENSBTAG00000047275	-115
ENSBTAG00000002476	-114
ENSBTAG00000003574	-114
ENSBTAG00000005116	-114
ENSBTAG00000005661	-114
ENSBTAG00000009213	-114
ENSBTAG00000009475	-114
ENSBTAG00000010413	-114
ENSBTAG00000011028	-114
ENSBTAG00000013410	-114
ENSBTAG00000014774	-114
ENSBTAG00000015060	-114
ENSBTAG00000016765	-114
ENSBTAG00000017677	-114
ENSBTAG00000018771	-114
ENSBTAG00000019130	-114
ENSBTAG00000021723	-114
ENSBTAG00000025165	-114
ENSBTAG00000030838	-114
ENSBTAG00000032003	-114
ENSBTAG00000033316	-114
ENSBTAG00000037786	-114
ENSBTAG00000039935	-114
ENSBTAG00000039968	-114
ENSBTAG00000046214	-114
ENSBTAG00000046467	-114
ENSBTAG00000046720	-114
bta_miR_28	-113
ENSBTAG00000006904	-113
ENSBTAG00000007116	-113
ENSBTAG00000011662	-113
ENSBTAG00000019235	-113
ENSBTAG00000021902	-113
ENSBTAG00000022837	-113
ENSBTAG00000026236	-113
ENSBTAG00000030246	-113
ENSBTAG00000031846	-113
ENSBTAG00000037110	-113
ENSBTAG00000044522	-113
ENSBTAG00000000516	-112
ENSBTAG00000002434	-112
ENSBTAG00000003020	-112
ENSBTAG00000005639	-112
ENSBTAG00000006740	-112
ENSBTAG00000007564	-112
ENSBTAG00000010124	-112
ENSBTAG00000011613	-112
ENSBTAG00000013265	-112
ENSBTAG00000014063	-112
ENSBTAG00000020260	-112
ENSBTAG00000021413	-112
ENSBTAG00000037844	-112
ENSBTAG00000037921	-112
ENSBTAG00000001443	-111
ENSBTAG00000009059	-111
ENSBTAG00000009273	-111
ENSBTAG00000009331	-111
ENSBTAG00000009446	-111
ENSBTAG00000010980	-111
ENSBTAG00000013027	-111
ENSBTAG00000013055	-111
ENSBTAG00000014655	-111
ENSBTAG00000016175	-111
ENSBTAG00000016698	-111
ENSBTAG00000016934	-111
ENSBTAG00000017083	-111
[truncated: 14,850 more rows]

## Sheet: CLA
Supplemental Table 7: Full list of differential hubbing (DH) values of all genes and miRNAs used in PCIT analysis for Oleic Acid (OA) and Conjugated Linoleic Acid (CLA) content.
gene.ID	H.cla.result1.txt-L.cla.result1.txt
ENSBTAG00000005578	-2126
ENSBTAG00000046307	-2112
ENSBTAG00000003849	-2060
ENSBTAG00000045822	-1997
ENSBTAG00000002634	-1987
ENSBTAG00000042370	-1977
ENSBTAG00000015716	-1974
ENSBTAG00000016397	-1966
ENSBTAG00000005882	-1965
ENSBTAG00000000647	-1942
ENSBTAG00000025450	-1939
ENSBTAG00000016511	-1934
ENSBTAG00000006958	-1903
ENSBTAG00000005180	-1896
ENSBTAG00000007937	-1896
ENSBTAG00000021836	-1893
ENSBTAG00000010052	-1873
ENSBTAG00000009460	-1869
ENSBTAG00000015286	-1858
ENSBTAG00000015196	-1857
ENSBTAG00000015590	-1857
ENSBTAG00000025554	-1857
ENSBTAG00000007216	-1855
ENSBTAG00000012047	-1849
ENSBTAG00000047760	-1846
ENSBTAG00000031797	-1845
ENSBTAG00000007202	-1839
ENSBTAG00000000182	-1836
ENSBTAG00000013250	-1834
ENSBTAG00000020417	-1808
ENSBTAG00000021471	-1808
ENSBTAG00000010311	-1807
ENSBTAG00000020647	-1807
ENSBTAG00000009692	-1790
ENSBTAG00000038181	-1779
ENSBTAG00000000940	-1778
ENSBTAG00000015935	-1776
ENSBTAG00000047496	-1775
ENSBTAG00000003555	-1766
ENSBTAG00000033453	-1766
ENSBTAG00000009490	-1762
ENSBTAG00000012058	-1753
ENSBTAG00000045601	-1745
ENSBTAG00000015896	-1743
ENSBTAG00000019388	-1741
ENSBTAG00000007636	-1736
ENSBTAG00000031583	-1736
ENSBTAG00000004824	-1731
ENSBTAG00000016716	-1728
ENSBTAG00000000459	-1726
ENSBTAG00000004050	-1722
ENSBTAG00000009414	-1712
ENSBTAG00000038430	-1707
ENSBTAG00000048169	-1706
ENSBTAG00000008893	-1702
ENSBTAG00000020633	-1697
ENSBTAG00000007513	-1695
ENSBTAG00000019052	-1693
ENSBTAG00000048234	-1690
ENSBTAG00000021016	-1687
ENSBTAG00000009780	-1686
ENSBTAG00000006045	-1679
ENSBTAG00000009682	-1678
ENSBTAG00000039992	-1676
ENSBTAG00000016024	-1674
ENSBTAG00000047132	-1674
ENSBTAG00000009410	-1673
ENSBTAG00000031696	-1669
ENSBTAG00000014304	-1657
ENSBTAG00000019703	-1654
ENSBTAG00000012113	-1648
ENSBTAG00000047659	-1648
ENSBTAG00000010597	-1643
ENSBTAG00000011333	-1643
ENSBTAG00000021547	-1643
ENSBTAG00000044092	-1643
ENSBTAG00000044173	-1640
ENSBTAG00000003757	-1639
ENSBTAG00000012355	-1638
ENSBTAG00000001252	-1635
ENSBTAG00000000608	-1633
ENSBTAG00000046974	-1632
ENSBTAG00000000602	-1631
ENSBTAG00000012697	-1628
ENSBTAG00000007103	-1625
ENSBTAG00000016023	-1617
ENSBTAG00000004154	-1616
ENSBTAG00000011241	-1616
ENSBTAG00000031686	-1616
ENSBTAG00000008432	-1611
ENSBTAG00000024482	-1609
ENSBTAG00000004907	-1608
ENSBTAG00000010546	-1604
ENSBTAG00000047508	-1604
ENSBTAG00000019625	-1603
ENSBTAG00000000154	-1601
ENSBTAG00000016441	-1600
ENSBTAG00000001695	-1595
ENSBTAG00000003155	-1593
ENSBTAG00000004832	-1593
ENSBTAG00000021090	-1593
ENSBTAG00000006586	-1592
ENSBTAG00000018176	-1583
ENSBTAG00000007476	-1575
ENSBTAG00000026428	-1574
ENSBTAG00000009190	-1573
ENSBTAG00000047248	-1571
ENSBTAG00000020999	-1569
ENSBTAG00000011556	-1565
ENSBTAG00000013308	-1564
ENSBTAG00000025822	-1564
ENSBTAG00000021520	-1562
ENSBTAG00000023933	-1561
ENSBTAG00000011861	-1560
ENSBTAG00000003439	-1559
ENSBTAG00000018254	-1559
ENSBTAG00000020880	-1559
ENSBTAG00000018390	-1557
ENSBTAG00000047287	-1556
ENSBTAG00000005085	-1553
ENSBTAG00000033143	-1553
ENSBTAG00000002336	-1552
ENSBTAG00000020292	-1552
ENSBTAG00000047883	-1551
ENSBTAG00000016331	-1550
ENSBTAG00000027991	-1545
ENSBTAG00000007658	-1542
ENSBTAG00000000266	-1541
ENSBTAG00000016243	-1541
ENSBTAG00000025830	-1540
ENSBTAG00000032660	-1540
ENSBTAG00000002938	-1539
ENSBTAG00000018969	-1538
ENSBTAG00000008633	-1535
ENSBTAG00000002829	-1534
ENSBTAG00000011951	-1533
ENSBTAG00000011156	-1529
ENSBTAG00000013460	-1529
ENSBTAG00000004421	-1528
ENSBTAG00000018432	-1527
ENSBTAG00000003707	-1520
ENSBTAG00000021435	-1519
ENSBTAG00000013579	-1518
ENSBTAG00000046486	-1517
ENSBTAG00000016591	-1516
ENSBTAG00000010249	-1515
ENSBTAG00000009407	-1514
ENSBTAG00000009570	-1511
ENSBTAG00000010383	-1511
ENSBTAG00000046820	-1511
ENSBTAG00000017889	-1508
ENSBTAG00000019029	-1504
ENSBTAG00000004631	-1501
ENSBTAG00000017804	-1496
ENSBTAG00000018267	-1496
ENSBTAG00000019725	-1496
ENSBTAG00000017645	-1492
ENSBTAG00000008492	-1490
ENSBTAG00000010481	-1490
ENSBTAG00000001138	-1489
ENSBTAG00000017919	-1489
ENSBTAG00000006644	-1488
ENSBTAG00000032455	-1488
ENSBTAG00000011495	-1486
ENSBTAG00000006213	-1484
ENSBTAG00000020755	-1484
ENSBTAG00000022954	-1483
ENSBTAG00000008241	-1480
ENSBTAG00000003239	-1476
ENSBTAG00000012418	-1475
ENSBTAG00000023471	-1472
ENSBTAG00000016174	-1469
ENSBTAG00000033077	-1469
ENSBTAG00000019010	-1467
ENSBTAG00000015010	-1460
ENSBTAG00000019164	-1459
ENSBTAG00000006797	-1458
ENSBTAG00000016259	-1453
ENSBTAG00000013380	-1452
ENSBTAG00000020221	-1452
ENSBTAG00000008661	-1451
ENSBTAG00000009243	-1450
ENSBTAG00000016455	-1450
ENSBTAG00000047708	-1449
ENSBTAG00000013874	-1447
ENSBTAG00000030319	-1445
ENSBTAG00000002792	-1443
ENSBTAG00000006982	-1439
ENSBTAG00000002186	-1437
ENSBTAG00000014194	-1437
ENSBTAG00000023417	-1436
ENSBTAG00000011950	-1433
ENSBTAG00000008412	-1432
ENSBTAG00000040215	-1432
ENSBTAG00000006985	-1431
ENSBTAG00000046311	-1430
ENSBTAG00000001565	-1426
ENSBTAG00000010015	-1426
ENSBTAG00000021237	-1425
ENSBTAG00000007974	-1424
ENSBTAG00000004379	-1423
ENSBTAG00000002192	-1421
ENSBTAG00000003386	-1420
ENSBTAG00000007623	-1420
ENSBTAG00000006022	-1419
ENSBTAG00000000613	-1418
ENSBTAG00000008619	-1417
ENSBTAG00000015963	-1417
ENSBTAG00000000279	-1416
ENSBTAG00000008369	-1416
ENSBTAG00000008498	-1415
ENSBTAG00000011127	-1414
ENSBTAG00000006345	-1413
ENSBTAG00000011529	-1413
ENSBTAG00000014349	-1413
ENSBTAG00000047650	-1412
ENSBTAG00000021452	-1411
ENSBTAG00000010020	-1410
ENSBTAG00000002678	-1409
ENSBTAG00000027525	-1407
ENSBTAG00000005714	-1405
ENSBTAG00000011876	-1400
ENSBTAG00000018708	-1400
ENSBTAG00000013627	-1398
ENSBTAG00000011487	-1397
ENSBTAG00000024431	-1397
ENSBTAG00000026842	-1395
ENSBTAG00000010407	-1393
ENSBTAG00000018538	-1391
ENSBTAG00000009271	-1382
ENSBTAG00000032151	-1381
ENSBTAG00000012720	-1379
ENSBTAG00000013204	-1378
ENSBTAG00000012030	-1377
ENSBTAG00000015677	-1374
ENSBTAG00000002277	-1371
ENSBTAG00000009491	-1371
ENSBTAG00000011869	-1370
ENSBTAG00000002313	-1369
ENSBTAG00000003369	-1367
ENSBTAG00000014777	-1367
ENSBTAG00000018065	-1366
ENSBTAG00000014881	-1361
ENSBTAG00000015644	-1361
ENSBTAG00000047108	-1361
ENSBTAG00000000195	-1358
ENSBTAG00000002736	-1358
ENSBTAG00000009755	-1356
ENSBTAG00000011589	-1356
ENSBTAG00000016484	-1356
ENSBTAG00000047569	-1356
ENSBTAG00000007605	-1354
ENSBTAG00000026758	-1354
ENSBTAG00000013300	-1351
ENSBTAG00000003058	-1350
ENSBTAG00000006017	-1350
ENSBTAG00000012471	-1349
ENSBTAG00000006386	-1348
ENSBTAG00000002783	-1346
ENSBTAG00000003083	-1346
ENSBTAG00000007364	-1346
ENSBTAG00000010958	-1346
ENSBTAG00000033735	-1345
ENSBTAG00000019027	-1344
ENSBTAG00000021438	-1344
ENSBTAG00000020781	-1342
ENSBTAG00000012605	-1341
ENSBTAG00000009002	-1340
ENSBTAG00000009489	-1340
ENSBTAG00000005102	-1336
ENSBTAG00000005580	-1336
ENSBTAG00000015112	-1336
ENSBTAG00000007117	-1335
ENSBTAG00000011582	-1335
ENSBTAG00000018851	-1332
ENSBTAG00000002755	-1331
ENSBTAG00000010838	-1331
ENSBTAG00000026809	-1330
ENSBTAG00000008590	-1329
ENSBTAG00000007008	-1328
ENSBTAG00000008809	-1327
ENSBTAG00000026266	-1327
ENSBTAG00000011812	-1326
ENSBTAG00000006501	-1325
ENSBTAG00000013290	-1325
ENSBTAG00000000132	-1323
ENSBTAG00000003086	-1323
ENSBTAG00000013798	-1323
ENSBTAG00000045609	-1323
ENSBTAG00000019534	-1322
ENSBTAG00000046385	-1321
ENSBTAG00000012927	-1320
ENSBTAG00000020257	-1319
ENSBTAG00000031673	-1319
ENSBTAG00000013740	-1318
ENSBTAG00000010279	-1317
ENSBTAG00000047965	-1317
ENSBTAG00000017429	-1316
ENSBTAG00000035323	-1314
ENSBTAG00000026673	-1312
ENSBTAG00000030600	-1312
ENSBTAG00000001042	-1311
ENSBTAG00000013895	-1311
ENSBTAG00000011767	-1310
ENSBTAG00000000061	-1309
ENSBTAG00000008170	-1309
ENSBTAG00000000473	-1308
ENSBTAG00000001597	-1307
ENSBTAG00000002223	-1306
ENSBTAG00000016736	-1306
ENSBTAG00000026254	-1306
ENSBTAG00000006671	-1305
ENSBTAG00000011683	-1305
ENSBTAG00000046588	-1305
ENSBTAG00000040381	-1304
ENSBTAG00000012480	-1303
ENSBTAG00000015882	-1303
ENSBTAG00000007210	-1302
ENSBTAG00000002377	-1301
ENSBTAG00000019060	-1301
ENSBTAG00000045658	-1301
ENSBTAG00000001093	-1300
ENSBTAG00000017232	-1300
ENSBTAG00000020747	-1300
ENSBTAG00000004822	-1299
ENSBTAG00000014030	-1299
ENSBTAG00000018600	-1299
ENSBTAG00000014042	-1296
ENSBTAG00000004575	-1294
ENSBTAG00000004215	-1293
ENSBTAG00000008573	-1293
ENSBTAG00000008434	-1292
ENSBTAG00000015301	-1291
ENSBTAG00000021248	-1291
ENSBTAG00000020416	-1290
ENSBTAG00000011617	-1289
ENSBTAG00000016147	-1289
ENSBTAG00000020583	-1289
ENSBTAG00000043976	-1289
ENSBTAG00000004173	-1287
ENSBTAG00000013440	-1287
ENSBTAG00000004930	-1286
ENSBTAG00000045886	-1285
ENSBTAG00000013621	-1284
ENSBTAG00000015444	-1284
ENSBTAG00000000781	-1283
ENSBTAG00000004990	-1283
ENSBTAG00000003334	-1282
ENSBTAG00000018072	-1282
ENSBTAG00000003097	-1281
ENSBTAG00000004111	-1281
ENSBTAG00000019824	-1280
ENSBTAG00000018834	-1279
ENSBTAG00000018035	-1278
ENSBTAG00000030675	-1278
ENSBTAG00000005431	-1276
ENSBTAG00000009852	-1275
ENSBTAG00000016600	-1275
ENSBTAG00000004552	-1274
ENSBTAG00000039287	-1274
ENSBTAG00000014041	-1273
ENSBTAG00000007371	-1272
ENSBTAG00000001844	-1271
ENSBTAG00000014146	-1271
ENSBTAG00000048217	-1271
ENSBTAG00000011172	-1270
ENSBTAG00000037650	-1270
ENSBTAG00000038604	-1268
ENSBTAG00000020652	-1266
ENSBTAG00000024493	-1264
ENSBTAG00000008652	-1263
ENSBTAG00000031750	-1263
ENSBTAG00000034368	-1263
ENSBTAG00000027916	-1262
ENSBTAG00000020125	-1261
ENSBTAG00000005392	-1259
ENSBTAG00000022382	-1258
ENSBTAG00000004460	-1257
ENSBTAG00000004604	-1257
ENSBTAG00000009584	-1257
ENSBTAG00000017352	-1257
ENSBTAG00000030174	-1257
ENSBTAG00000033603	-1257
ENSBTAG00000037996	-1257
ENSBTAG00000012511	-1255
ENSBTAG00000015690	-1255
ENSBTAG00000002698	-1254
ENSBTAG00000005197	-1254
ENSBTAG00000000291	-1253
ENSBTAG00000033803	-1253
ENSBTAG00000003715	-1252
ENSBTAG00000021700	-1252
ENSBTAG00000003754	-1251
ENSBTAG00000003691	-1250
ENSBTAG00000011460	-1250
ENSBTAG00000019953	-1250
ENSBTAG00000000820	-1249
ENSBTAG00000011805	-1249
ENSBTAG00000025405	-1247
ENSBTAG00000016161	-1245
ENSBTAG00000017278	-1243
ENSBTAG00000005960	-1242
ENSBTAG00000016077	-1241
ENSBTAG00000016896	-1241
ENSBTAG00000020889	-1241
ENSBTAG00000009308	-1240
ENSBTAG00000013326	-1237
ENSBTAG00000018579	-1237
ENSBTAG00000018718	-1237
ENSBTAG00000004777	-1236
ENSBTAG00000010105	-1236
ENSBTAG00000012628	-1236
ENSBTAG00000007756	-1235
ENSBTAG00000010576	-1235
ENSBTAG00000020381	-1235
ENSBTAG00000003330	-1234
ENSBTAG00000018724	-1233
ENSBTAG00000019695	-1233
ENSBTAG00000021789	-1233
ENSBTAG00000004636	-1229
ENSBTAG00000005534	-1229
ENSBTAG00000021377	-1228
ENSBTAG00000008121	-1225
ENSBTAG00000003288	-1224
ENSBTAG00000005483	-1224
ENSBTAG00000046757	-1223
ENSBTAG00000014048	-1222
ENSBTAG00000015308	-1222
ENSBTAG00000010357	-1221
ENSBTAG00000031614	-1221
ENSBTAG00000039456	-1221
ENSBTAG00000018064	-1220
ENSBTAG00000013779	-1219
ENSBTAG00000010341	-1218
ENSBTAG00000031749	-1218
ENSBTAG00000014119	-1217
ENSBTAG00000020297	-1217
ENSBTAG00000021208	-1216
ENSBTAG00000000632	-1213
ENSBTAG00000017032	-1212
ENSBTAG00000007208	-1211
ENSBTAG00000013123	-1210
ENSBTAG00000010694	-1209
ENSBTAG00000020303	-1209
ENSBTAG00000043961	-1209
ENSBTAG00000006526	-1208
ENSBTAG00000033334	-1208
ENSBTAG00000008219	-1207
ENSBTAG00000019851	-1207
ENSBTAG00000040055	-1207
ENSBTAG00000007352	-1200
ENSBTAG00000014773	-1200
ENSBTAG00000018295	-1198
ENSBTAG00000001702	-1197
ENSBTAG00000011360	-1197
ENSBTAG00000001498	-1195
ENSBTAG00000004256	-1195
ENSBTAG00000016913	-1194
ENSBTAG00000015567	-1193
ENSBTAG00000004242	-1192
ENSBTAG00000008151	-1192
ENSBTAG00000031837	-1192
ENSBTAG00000015146	-1191
ENSBTAG00000001768	-1190
ENSBTAG00000019853	-1190
ENSBTAG00000019830	-1189
ENSBTAG00000002103	-1188
ENSBTAG00000006619	-1188
ENSBTAG00000011984	-1188
ENSBTAG00000013641	-1188
ENSBTAG00000016758	-1187
ENSBTAG00000048225	-1186
ENSBTAG00000010976	-1184
ENSBTAG00000014143	-1184
ENSBTAG00000040244	-1184
ENSBTAG00000002866	-1180
ENSBTAG00000013949	-1180
ENSBTAG00000021045	-1180
ENSBTAG00000012143	-1179
ENSBTAG00000017594	-1178
ENSBTAG00000002833	-1177
ENSBTAG00000011547	-1177
ENSBTAG00000024932	-1177
ENSBTAG00000034449	-1177
ENSBTAG00000019024	-1176
ENSBTAG00000038970	-1176
ENSBTAG00000033747	-1174
ENSBTAG00000014102	-1173
ENSBTAG00000026502	-1173
ENSBTAG00000047174	-1172
ENSBTAG00000010826	-1171
ENSBTAG00000014312	-1171
ENSBTAG00000046821	-1171
ENSBTAG00000002392	-1170
ENSBTAG00000001601	-1169
ENSBTAG00000021396	-1167
ENSBTAG00000001595	-1166
ENSBTAG00000044135	-1166
ENSBTAG00000002050	-1165
ENSBTAG00000006679	-1165
ENSBTAG00000019329	-1165
ENSBTAG00000014659	-1163
ENSBTAG00000019933	-1163
ENSBTAG00000002280	-1162
ENSBTAG00000004835	-1162
ENSBTAG00000015702	-1162
ENSBTAG00000016309	-1162
ENSBTAG00000019652	-1162
ENSBTAG00000002181	-1160
ENSBTAG00000003259	-1160
ENSBTAG00000020309	-1160
ENSBTAG00000037781	-1160
ENSBTAG00000009942	-1157
ENSBTAG00000021893	-1157
ENSBTAG00000014371	-1155
ENSBTAG00000001374	-1154
ENSBTAG00000011905	-1154
ENSBTAG00000017814	-1154
ENSBTAG00000005940	-1153
ENSBTAG00000018884	-1153
ENSBTAG00000007519	-1152
ENSBTAG00000013387	-1151
ENSBTAG00000015651	-1150
ENSBTAG00000038620	-1149
ENSBTAG00000009412	-1147
ENSBTAG00000015343	-1147
ENSBTAG00000004531	-1146
ENSBTAG00000013562	-1146
ENSBTAG00000001403	-1145
ENSBTAG00000006370	-1145
ENSBTAG00000013001	-1145
ENSBTAG00000031573	-1145
ENSBTAG00000009579	-1144
ENSBTAG00000013545	-1144
ENSBTAG00000019611	-1144
ENSBTAG00000012159	-1143
ENSBTAG00000021087	-1143
ENSBTAG00000000106	-1142
ENSBTAG00000023054	-1142
ENSBTAG00000024487	-1142
ENSBTAG00000039556	-1141
ENSBTAG00000016448	-1140
ENSBTAG00000018088	-1140
ENSBTAG00000046512	-1139
ENSBTAG00000012361	-1138
ENSBTAG00000014667	-1138
ENSBTAG00000039028	-1138
ENSBTAG00000006656	-1137
ENSBTAG00000020340	-1137
ENSBTAG00000013793	-1136
ENSBTAG00000008084	-1135
ENSBTAG00000040128	-1135
ENSBTAG00000004349	-1133
ENSBTAG00000019920	-1131
ENSBTAG00000006065	-1130
ENSBTAG00000011243	-1130
ENSBTAG00000010238	-1129
ENSBTAG00000030940	-1129
ENSBTAG00000000998	-1128
ENSBTAG00000008730	-1128
ENSBTAG00000012863	-1128
ENSBTAG00000019474	-1128
ENSBTAG00000010375	-1127
ENSBTAG00000016524	-1127
ENSBTAG00000011458	-1126
ENSBTAG00000014151	-1126
ENSBTAG00000018185	-1126
ENSBTAG00000046005	-1126
ENSBTAG00000009458	-1125
ENSBTAG00000006101	-1123
ENSBTAG00000007142	-1123
ENSBTAG00000003051	-1121
ENSBTAG00000012762	-1121
ENSBTAG00000029920	-1121
ENSBTAG00000011680	-1120
ENSBTAG00000038316	-1119
ENSBTAG00000002259	-1118
ENSBTAG00000012915	-1117
ENSBTAG00000020668	-1117
ENSBTAG00000044007	-1117
ENSBTAG00000005912	-1116
ENSBTAG00000011094	-1116
ENSBTAG00000020544	-1116
ENSBTAG00000019755	-1115
ENSBTAG00000002508	-1114
ENSBTAG00000012241	-1114
ENSBTAG00000014547	-1114
ENSBTAG00000046493	-1114
ENSBTAG00000047805	-1114
ENSBTAG00000012049	-1113
ENSBTAG00000013112	-1112
ENSBTAG00000007725	-1111
ENSBTAG00000014469	-1111
ENSBTAG00000018739	-1111
ENSBTAG00000000902	-1109
ENSBTAG00000006733	-1109
ENSBTAG00000014153	-1109
ENSBTAG00000031829	-1109
ENSBTAG00000001818	-1108
ENSBTAG00000038379	-1107
ENSBTAG00000002721	-1106
ENSBTAG00000006768	-1106
ENSBTAG00000018790	-1105
ENSBTAG00000007414	-1104
ENSBTAG00000014111	-1104
ENSBTAG00000017542	-1104
ENSBTAG00000018554	-1104
ENSBTAG00000020594	-1104
ENSBTAG00000018161	-1103
ENSBTAG00000018744	-1103
ENSBTAG00000018430	-1102
ENSBTAG00000030168	-1102
ENSBTAG00000016167	-1101
ENSBTAG00000018084	-1101
ENSBTAG00000034936	-1101
ENSBTAG00000046952	-1101
ENSBTAG00000016236	-1100
ENSBTAG00000020410	-1100
ENSBTAG00000021091	-1100
ENSBTAG00000007187	-1099
ENSBTAG00000014553	-1099
ENSBTAG00000004258	-1098
ENSBTAG00000007523	-1098
ENSBTAG00000008306	-1098
ENSBTAG00000014848	-1098
ENSBTAG00000005833	-1096
ENSBTAG00000009560	-1096
ENSBTAG00000019665	-1096
ENSBTAG00000040551	-1096
ENSBTAG00000010247	-1095
ENSBTAG00000006204	-1094
ENSBTAG00000019986	-1094
ENSBTAG00000021761	-1094
ENSBTAG00000004532	-1093
ENSBTAG00000010630	-1093
ENSBTAG00000020619	-1092
ENSBTAG00000047930	-1092
ENSBTAG00000039014	-1091
ENSBTAG00000044207	-1091
ENSBTAG00000003237	-1090
ENSBTAG00000007901	-1090
ENSBTAG00000021346	-1090
ENSBTAG00000019387	-1089
ENSBTAG00000020154	-1089
ENSBTAG00000001308	-1088
ENSBTAG00000008053	-1088
ENSBTAG00000002795	-1087
ENSBTAG00000022613	-1086
ENSBTAG00000032288	-1086
ENSBTAG00000039335	-1086
ENSBTAG00000002596	-1085
ENSBTAG00000010207	-1085
ENSBTAG00000003039	-1084
ENSBTAG00000003532	-1084
ENSBTAG00000011374	-1083
ENSBTAG00000047031	-1083
ENSBTAG00000020775	-1082
ENSBTAG00000025644	-1082
ENSBTAG00000021262	-1081
ENSBTAG00000039172	-1081
ENSBTAG00000000421	-1079
ENSBTAG00000012082	-1079
ENSBTAG00000015310	-1077
ENSBTAG00000001740	-1076
ENSBTAG00000011056	-1076
ENSBTAG00000018775	-1075
ENSBTAG00000021600	-1073
ENSBTAG00000015942	-1072
ENSBTAG00000038104	-1072
ENSBTAG00000019213	-1071
ENSBTAG00000046498	-1071
ENSBTAG00000046502	-1071
ENSBTAG00000016313	-1070
ENSBTAG00000007546	-1069
ENSBTAG00000018859	-1069
ENSBTAG00000007646	-1068
ENSBTAG00000025642	-1068
ENSBTAG00000037709	-1068
ENSBTAG00000007757	-1067
ENSBTAG00000019304	-1067
ENSBTAG00000003073	-1064
ENSBTAG00000014150	-1064
ENSBTAG00000006138	-1063
ENSBTAG00000014956	-1063
ENSBTAG00000022733	-1063
ENSBTAG00000007269	-1061
ENSBTAG00000018967	-1061
ENSBTAG00000031905	-1061
ENSBTAG00000011291	-1060
ENSBTAG00000003208	-1059
ENSBTAG00000006506	-1059
ENSBTAG00000006347	-1057
ENSBTAG00000006529	-1056
ENSBTAG00000020780	-1056
ENSBTAG00000007737	-1055
ENSBTAG00000011392	-1055
ENSBTAG00000021024	-1055
ENSBTAG00000003960	-1054
ENSBTAG00000012382	-1054
ENSBTAG00000012939	-1053
ENSBTAG00000019857	-1053
ENSBTAG00000045864	-1053
ENSBTAG00000015522	-1052
ENSBTAG00000017028	-1052
ENSBTAG00000046248	-1052
ENSBTAG00000001711	-1051
ENSBTAG00000004225	-1051
ENSBTAG00000010085	-1051
ENSBTAG00000001731	-1049
ENSBTAG00000004100	-1048
ENSBTAG00000010701	-1048
ENSBTAG00000009661	-1047
ENSBTAG00000011298	-1047
ENSBTAG00000011299	-1047
ENSBTAG00000018213	-1047
ENSBTAG00000018164	-1046
ENSBTAG00000019289	-1046
ENSBTAG00000000767	-1045
ENSBTAG00000006070	-1045
ENSBTAG00000009233	-1045
ENSBTAG00000023343	-1045
ENSBTAG00000045628	-1045
ENSBTAG00000007096	-1044
ENSBTAG00000009879	-1044
ENSBTAG00000016644	-1044
ENSBTAG00000001942	-1043
ENSBTAG00000008371	-1043
ENSBTAG00000005413	-1042
ENSBTAG00000009554	-1042
ENSBTAG00000009757	-1042
ENSBTAG00000003570	-1040
ENSBTAG00000004063	-1040
ENSBTAG00000011677	-1040
ENSBTAG00000021577	-1040
ENSBTAG00000001651	-1039
ENSBTAG00000012577	-1039
ENSBTAG00000018318	-1038
ENSBTAG00000006670	-1037
ENSBTAG00000008346	-1037
ENSBTAG00000013015	-1036
ENSBTAG00000013464	-1035
ENSBTAG00000005426	-1034
ENSBTAG00000020601	-1034
ENSBTAG00000007159	-1033
ENSBTAG00000006242	-1032
ENSBTAG00000016895	-1032
ENSBTAG00000038696	-1032
ENSBTAG00000005564	-1031
ENSBTAG00000032527	-1031
ENSBTAG00000011162	-1030
ENSBTAG00000003866	-1029
ENSBTAG00000015946	-1029
ENSBTAG00000016830	-1029
ENSBTAG00000027316	-1029
ENSBTAG00000038173	-1029
ENSBTAG00000000312	-1026
ENSBTAG00000002630	-1026
ENSBTAG00000019062	-1025
ENSBTAG00000000225	-1024
ENSBTAG00000003221	-1024
ENSBTAG00000005370	-1024
ENSBTAG00000010008	-1024
ENSBTAG00000010790	-1024
ENSBTAG00000019197	-1024
ENSBTAG00000006954	-1023
ENSBTAG00000009632	-1023
ENSBTAG00000009306	-1021
ENSBTAG00000010852	-1018
ENSBTAG00000011358	-1018
ENSBTAG00000045575	-1018
ENSBTAG00000000948	-1017
ENSBTAG00000013722	-1017
ENSBTAG00000016904	-1017
ENSBTAG00000005345	-1016
ENSBTAG00000006616	-1016
ENSBTAG00000007363	-1016
ENSBTAG00000027390	-1015
ENSBTAG00000001117	-1014
ENSBTAG00000001627	-1014
ENSBTAG00000021675	-1012
ENSBTAG00000010579	-1011
ENSBTAG00000045306	-1011
ENSBTAG00000012683	-1010
ENSBTAG00000014074	-1010
ENSBTAG00000015163	-1010
ENSBTAG00000011129	-1009
ENSBTAG00000012552	-1009
ENSBTAG00000015416	-1009
ENSBTAG00000045750	-1009
ENSBTAG00000007689	-1008
ENSBTAG00000024958	-1008
ENSBTAG00000002888	-1007
ENSBTAG00000010180	-1007
ENSBTAG00000020717	-1007
ENSBTAG00000034159	-1007
ENSBTAG00000047077	-1006
ENSBTAG00000014269	-1005
ENSBTAG00000017512	-1005
ENSBTAG00000021586	-1005
ENSBTAG00000020878	-1004
ENSBTAG00000021472	-1004
ENSBTAG00000039117	-1004
ENSBTAG00000005904	-1003
ENSBTAG00000009685	-1003
ENSBTAG00000011864	-1003
ENSBTAG00000042963	-1003
ENSBTAG00000002126	-1002
ENSBTAG00000005724	-1002
ENSBTAG00000038783	-1001
ENSBTAG00000008003	-1000
ENSBTAG00000015771	-1000
ENSBTAG00000020028	-1000
ENSBTAG00000016221	-999
ENSBTAG00000047685	-999
ENSBTAG00000006784	-998
ENSBTAG00000004993	-997
ENSBTAG00000006755	-997
ENSBTAG00000014080	-997
ENSBTAG00000033315	-997
ENSBTAG00000017825	-996
ENSBTAG00000008260	-995
ENSBTAG00000012070	-995
ENSBTAG00000022069	-995
ENSBTAG00000018589	-994
ENSBTAG00000019501	-994
ENSBTAG00000047468	-994
ENSBTAG00000017177	-993
ENSBTAG00000012975	-992
ENSBTAG00000015752	-992
ENSBTAG00000018425	-992
ENSBTAG00000040063	-992
ENSBTAG00000006517	-991
ENSBTAG00000003177	-990
ENSBTAG00000008840	-990
ENSBTAG00000011975	-990
ENSBTAG00000018912	-990
ENSBTAG00000002966	-989
ENSBTAG00000044129	-989
ENSBTAG00000000640	-988
ENSBTAG00000044061	-988
ENSBTAG00000005025	-987
ENSBTAG00000007494	-987
ENSBTAG00000008704	-987
ENSBTAG00000010677	-986
ENSBTAG00000011744	-986
ENSBTAG00000013011	-986
ENSBTAG00000004776	-985
ENSBTAG00000012797	-985
ENSBTAG00000004564	-984
ENSBTAG00000012989	-984
ENSBTAG00000010403	-983
ENSBTAG00000007123	-982
ENSBTAG00000018829	-982
ENSBTAG00000021172	-982
ENSBTAG00000030567	-982
ENSBTAG00000009084	-981
ENSBTAG00000016738	-981
ENSBTAG00000011311	-979
ENSBTAG00000000898	-978
ENSBTAG00000005573	-978
ENSBTAG00000001008	-977
ENSBTAG00000001999	-977
ENSBTAG00000006165	-977
ENSBTAG00000010359	-976
ENSBTAG00000012638	-976
ENSBTAG00000013799	-976
ENSBTAG00000020244	-976
ENSBTAG00000039634	-976
ENSBTAG00000010637	-975
ENSBTAG00000018580	-975
ENSBTAG00000009783	-974
ENSBTAG00000018199	-974
ENSBTAG00000018869	-974
ENSBTAG00000019707	-974
ENSBTAG00000004965	-973
ENSBTAG00000008958	-973
ENSBTAG00000022847	-973
ENSBTAG00000004489	-972
ENSBTAG00000012745	-972
ENSBTAG00000000704	-971
ENSBTAG00000002267	-971
ENSBTAG00000003997	-971
ENSBTAG00000007323	-971
ENSBTAG00000014101	-971
ENSBTAG00000001282	-969
ENSBTAG00000003322	-969
ENSBTAG00000002319	-968
ENSBTAG00000005730	-968
ENSBTAG00000005812	-968
ENSBTAG00000006086	-968
ENSBTAG00000008613	-968
ENSBTAG00000012168	-968
ENSBTAG00000013245	-968
ENSBTAG00000020704	-968
ENSBTAG00000024526	-968
ENSBTAG00000001258	-967
ENSBTAG00000002605	-967
ENSBTAG00000005354	-967
ENSBTAG00000015591	-967
ENSBTAG00000043166	-967
ENSBTAG00000015839	-966
ENSBTAG00000008313	-965
ENSBTAG00000045565	-965
ENSBTAG00000000275	-964
ENSBTAG00000000569	-964
ENSBTAG00000005525	-964
ENSBTAG00000005683	-964
ENSBTAG00000015073	-964
ENSBTAG00000001026	-963
ENSBTAG00000013652	-963
ENSBTAG00000004387	-962
ENSBTAG00000013727	-962
ENSBTAG00000020379	-962
ENSBTAG00000008674	-961
ENSBTAG00000012946	-961
ENSBTAG00000047855	-960
ENSBTAG00000001021	-959
ENSBTAG00000030426	-959
ENSBTAG00000033255	-959
ENSBTAG00000038174	-958
ENSBTAG00000021131	-957
ENSBTAG00000032657	-957
ENSBTAG00000036373	-957
ENSBTAG00000002774	-956
ENSBTAG00000000434	-955
ENSBTAG00000021932	-955
ENSBTAG00000033457	-955
ENSBTAG00000011396	-954
ENSBTAG00000020177	-954
ENSBTAG00000001892	-953
ENSBTAG00000017719	-953
ENSBTAG00000027069	-953
ENSBTAG00000046068	-953
ENSBTAG00000018937	-952
ENSBTAG00000006579	-951
ENSBTAG00000010906	-951
ENSBTAG00000013941	-951
ENSBTAG00000020561	-951
ENSBTAG00000014248	-950
ENSBTAG00000016363	-950
ENSBTAG00000047362	-950
ENSBTAG00000009912	-949
ENSBTAG00000013465	-949
ENSBTAG00000044284	-949
ENSBTAG00000005384	-948
ENSBTAG00000007964	-948
ENSBTAG00000038757	-948
ENSBTAG00000047756	-948
ENSBTAG00000002673	-947
ENSBTAG00000035615	-947
ENSBTAG00000040361	-946
ENSBTAG00000006195	-945
ENSBTAG00000010360	-945
ENSBTAG00000022314	-945
ENSBTAG00000024960	-945
ENSBTAG00000000103	-944
ENSBTAG00000003817	-944
ENSBTAG00000009769	-944
ENSBTAG00000012096	-944
ENSBTAG00000046509	-944
ENSBTAG00000009072	-943
ENSBTAG00000009726	-942
ENSBTAG00000010657	-942
ENSBTAG00000013330	-942
ENSBTAG00000004603	-941
ENSBTAG00000016757	-941
ENSBTAG00000015901	-940
ENSBTAG00000005240	-939
ENSBTAG00000024957	-939
ENSBTAG00000009330	-937
ENSBTAG00000010422	-937
ENSBTAG00000002060	-936
ENSBTAG00000002996	-936
ENSBTAG00000016430	-936
ENSBTAG00000002295	-935
ENSBTAG00000013858	-934
ENSBTAG00000013860	-934
ENSBTAG00000017441	-934
ENSBTAG00000021785	-934
ENSBTAG00000021869	-934
ENSBTAG00000014334	-933
ENSBTAG00000009835	-931
ENSBTAG00000012243	-931
ENSBTAG00000016823	-931
ENSBTAG00000022372	-931
ENSBTAG00000013277	-930
ENSBTAG00000043140	-930
ENSBTAG00000001408	-929
ENSBTAG00000012067	-929
ENSBTAG00000010563	-928
ENSBTAG00000017469	-927
ENSBTAG00000045504	-927
ENSBTAG00000005251	-926
ENSBTAG00000005786	-926
ENSBTAG00000006666	-926
ENSBTAG00000018482	-926
ENSBTAG00000046367	-926
ENSBTAG00000006491	-925
ENSBTAG00000008761	-925
ENSBTAG00000035958	-925
ENSBTAG00000006175	-924
ENSBTAG00000012715	-924
ENSBTAG00000019848	-923
ENSBTAG00000020685	-923
ENSBTAG00000005557	-922
ENSBTAG00000008228	-922
ENSBTAG00000009446	-922
ENSBTAG00000009928	-922
ENSBTAG00000030518	-922
ENSBTAG00000013921	-921
ENSBTAG00000013955	-921
ENSBTAG00000047942	-921
ENSBTAG00000000347	-920
ENSBTAG00000002915	-920
ENSBTAG00000025848	-920
ENSBTAG00000016999	-919
ENSBTAG00000018752	-919
ENSBTAG00000009856	-918
ENSBTAG00000010559	-918
ENSBTAG00000021896	-918
ENSBTAG00000001249	-917
ENSBTAG00000012625	-917
ENSBTAG00000015051	-917
ENSBTAG00000017694	-917
ENSBTAG00000039275	-917
ENSBTAG00000045941	-917
ENSBTAG00000001483	-916
ENSBTAG00000006836	-916
ENSBTAG00000009665	-916
ENSBTAG00000018643	-916
ENSBTAG00000019011	-916
ENSBTAG00000003279	-915
ENSBTAG00000003857	-915
ENSBTAG00000021592	-915
ENSBTAG00000046688	-915
ENSBTAG00000008091	-914
ENSBTAG00000025462	-914
ENSBTAG00000013343	-913
ENSBTAG00000027049	-913
ENSBTAG00000000160	-912
ENSBTAG00000014187	-912
ENSBTAG00000022699	-912
ENSBTAG00000026580	-912
ENSBTAG00000011608	-911
ENSBTAG00000019823	-911
ENSBTAG00000025477	-911
ENSBTAG00000007872	-910
ENSBTAG00000008990	-910
ENSBTAG00000019138	-910
ENSBTAG00000020384	-910
ENSBTAG00000012738	-909
ENSBTAG00000014476	-908
ENSBTAG00000015779	-908
ENSBTAG00000017388	-908
ENSBTAG00000020042	-908
ENSBTAG00000034182	-908
ENSBTAG00000001179	-907
ENSBTAG00000008815	-907
ENSBTAG00000016094	-907
ENSBTAG00000017074	-907
ENSBTAG00000032087	-907
ENSBTAG00000014725	-906
ENSBTAG00000017035	-906
ENSBTAG00000001477	-905
ENSBTAG00000005916	-905
ENSBTAG00000010126	-905
ENSBTAG00000011834	-905
ENSBTAG00000015178	-905
ENSBTAG00000021064	-905
ENSBTAG00000046034	-905
ENSBTAG00000008762	-904
ENSBTAG00000019929	-904
ENSBTAG00000021410	-904
ENSBTAG00000009552	-903
ENSBTAG00000047845	-903
ENSBTAG00000046529	-902
ENSBTAG00000007813	-901
ENSBTAG00000011108	-901
ENSBTAG00000012417	-901
ENSBTAG00000017666	-901
ENSBTAG00000019023	-901
ENSBTAG00000021068	-901
ENSBTAG00000038706	-901
ENSBTAG00000001640	-900
ENSBTAG00000017490	-900
ENSBTAG00000016648	-899
ENSBTAG00000003848	-898
ENSBTAG00000004771	-898
ENSBTAG00000000639	-897
ENSBTAG00000013270	-897
ENSBTAG00000021842	-897
ENSBTAG00000023795	-897
ENSBTAG00000025595	-897
ENSBTAG00000000656	-896
ENSBTAG00000019242	-896
ENSBTAG00000013834	-895
ENSBTAG00000043911	-895
ENSBTAG00000047992	-895
ENSBTAG00000010451	-894
ENSBTAG00000045966	-894
ENSBTAG00000001573	-893
ENSBTAG00000002917	-893
ENSBTAG00000019456	-893
ENSBTAG00000000560	-892
ENSBTAG00000008285	-892
ENSBTAG00000009519	-892
ENSBTAG00000013620	-892
ENSBTAG00000017901	-892
ENSBTAG00000040018	-892
ENSBTAG00000021678	-891
ENSBTAG00000002658	-890
ENSBTAG00000004172	-890
ENSBTAG00000005757	-890
ENSBTAG00000016267	-890
ENSBTAG00000023792	-890
ENSBTAG00000015333	-889
ENSBTAG00000026992	-889
ENSBTAG00000000480	-888
ENSBTAG00000002440	-888
ENSBTAG00000004961	-888
ENSBTAG00000015885	-887
ENSBTAG00000018272	-887
ENSBTAG00000010513	-886
ENSBTAG00000011826	-886
ENSBTAG00000014399	-886
ENSBTAG00000021997	-886
ENSBTAG00000015977	-885
ENSBTAG00000016532	-885
ENSBTAG00000009748	-884
ENSBTAG00000018427	-884
ENSBTAG00000009549	-883
ENSBTAG00000010386	-883
ENSBTAG00000023472	-883
ENSBTAG00000046092	-883
ENSBTAG00000018247	-882
ENSBTAG00000006936	-881
ENSBTAG00000019358	-881
ENSBTAG00000021899	-881
ENSBTAG00000023947	-881
ENSBTAG00000030930	-881
ENSBTAG00000047973	-881
ENSBTAG00000013226	-880
ENSBTAG00000018921	-880
ENSBTAG00000038577	-880
ENSBTAG00000043958	-880
ENSBTAG00000047828	-880
ENSBTAG00000000149	-879
ENSBTAG00000008394	-879
ENSBTAG00000010178	-879
ENSBTAG00000026986	-879
ENSBTAG00000046301	-879
ENSBTAG00000002460	-878
ENSBTAG00000011397	-878
ENSBTAG00000019322	-878
ENSBTAG00000021977	-878
ENSBTAG00000022489	-878
ENSBTAG00000012919	-877
ENSBTAG00000004212	-876
ENSBTAG00000008353	-876
ENSBTAG00000021630	-876
ENSBTAG00000021787	-876
ENSBTAG00000001988	-875
ENSBTAG00000007097	-875
ENSBTAG00000010551	-875
ENSBTAG00000026915	-875
ENSBTAG00000000599	-874
ENSBTAG00000001126	-874
ENSBTAG00000001632	-874
ENSBTAG00000008435	-874
ENSBTAG00000015419	-874
ENSBTAG00000031786	-874
ENSBTAG00000005676	-873
ENSBTAG00000012464	-873
ENSBTAG00000037393	-873
ENSBTAG00000011994	-872
ENSBTAG00000016799	-872
ENSBTAG00000005571	-871
ENSBTAG00000033422	-871
ENSBTAG00000011626	-869
ENSBTAG00000019365	-869
ENSBTAG00000047354	-869
ENSBTAG00000002069	-868
ENSBTAG00000007746	-868
ENSBTAG00000019015	-868
ENSBTAG00000032433	-868
ENSBTAG00000013693	-867
ENSBTAG00000031287	-867
ENSBTAG00000018852	-866
ENSBTAG00000014361	-865
ENSBTAG00000014710	-865
ENSBTAG00000017137	-865
ENSBTAG00000021920	-865
ENSBTAG00000024723	-865
ENSBTAG00000008048	-864
ENSBTAG00000014082	-864
ENSBTAG00000007382	-863
ENSBTAG00000020233	-862
ENSBTAG00000014178	-861
ENSBTAG00000004302	-860
ENSBTAG00000006383	-860
ENSBTAG00000000362	-859
ENSBTAG00000018559	-858
ENSBTAG00000020482	-858
ENSBTAG00000020806	-858
ENSBTAG00000029855	-858
ENSBTAG00000001144	-857
ENSBTAG00000001499	-857
ENSBTAG00000002411	-857
ENSBTAG00000009293	-857
ENSBTAG00000002650	-856
ENSBTAG00000002971	-856
ENSBTAG00000019279	-856
ENSBTAG00000019574	-856
ENSBTAG00000019942	-856
ENSBTAG00000046440	-856
ENSBTAG00000019275	-854
ENSBTAG00000023453	-854
ENSBTAG00000002435	-853
ENSBTAG00000004554	-853
ENSBTAG00000014794	-853
ENSBTAG00000016062	-853
ENSBTAG00000003015	-852
ENSBTAG00000009061	-852
ENSBTAG00000015127	-852
ENSBTAG00000016072	-852
ENSBTAG00000020281	-852
ENSBTAG00000006533	-851
ENSBTAG00000008288	-851
ENSBTAG00000019515	-851
ENSBTAG00000000090	-850
ENSBTAG00000003958	-850
ENSBTAG00000009165	-850
ENSBTAG00000027326	-850
ENSBTAG00000012272	-849
ENSBTAG00000006678	-848
ENSBTAG00000031001	-848
ENSBTAG00000015166	-847
ENSBTAG00000018108	-847
ENSBTAG00000014302	-845
ENSBTAG00000009310	-844
ENSBTAG00000017528	-844
ENSBTAG00000018804	-844
ENSBTAG00000036087	-844
ENSBTAG00000000911	-843
ENSBTAG00000002000	-843
ENSBTAG00000004438	-843
ENSBTAG00000005866	-843
ENSBTAG00000007378	-843
ENSBTAG00000009708	-843
ENSBTAG00000018546	-843
ENSBTAG00000022799	-843
ENSBTAG00000040427	-843
ENSBTAG00000007170	-842
ENSBTAG00000012667	-842
ENSBTAG00000016795	-842
ENSBTAG00000021653	-842
ENSBTAG00000022158	-842
ENSBTAG00000006411	-841
ENSBTAG00000047948	-841
ENSBTAG00000006161	-840
ENSBTAG00000009836	-840
ENSBTAG00000016572	-840
ENSBTAG00000018449	-840
ENSBTAG00000033345	-840
ENSBTAG00000035370	-840
ENSBTAG00000046726	-840
ENSBTAG00000008257	-838
ENSBTAG00000013423	-838
ENSBTAG00000031069	-838
ENSBTAG00000006878	-837
ENSBTAG00000007615	-837
ENSBTAG00000019964	-837
ENSBTAG00000001781	-836
ENSBTAG00000004449	-836
ENSBTAG00000008034	-836
ENSBTAG00000014609	-836
ENSBTAG00000018207	-836
ENSBTAG00000002516	-835
ENSBTAG00000011927	-834
ENSBTAG00000001346	-833
ENSBTAG00000007963	-833
ENSBTAG00000047879	-833
ENSBTAG00000017488	-832
ENSBTAG00000010006	-831
ENSBTAG00000015856	-831
ENSBTAG00000001639	-830
ENSBTAG00000008222	-830
ENSBTAG00000018861	-830
ENSBTAG00000033056	-830
ENSBTAG00000007433	-829
ENSBTAG00000009265	-829
ENSBTAG00000001575	-828
ENSBTAG00000002920	-828
ENSBTAG00000003935	-828
ENSBTAG00000021487	-828
ENSBTAG00000023601	-828
ENSBTAG00000025612	-828
ENSBTAG00000020799	-827
ENSBTAG00000039343	-827
ENSBTAG00000002315	-826
ENSBTAG00000009663	-826
ENSBTAG00000009696	-826
ENSBTAG00000019281	-826
ENSBTAG00000000134	-825
ENSBTAG00000000290	-825
ENSBTAG00000048229	-825
ENSBTAG00000007942	-824
ENSBTAG00000011532	-824
ENSBTAG00000015317	-824
ENSBTAG00000043706	-824
ENSBTAG00000010131	-823
ENSBTAG00000019784	-823
ENSBTAG00000002291	-822
ENSBTAG00000006305	-822
ENSBTAG00000021919	-822
ENSBTAG00000006046	-821
ENSBTAG00000047059	-821
ENSBTAG00000023078	-820
ENSBTAG00000044074	-820
ENSBTAG00000002121	-819
ENSBTAG00000004199	-819
ENSBTAG00000016512	-819
ENSBTAG00000017573	-819
ENSBTAG00000019051	-819
ENSBTAG00000019750	-819
ENSBTAG00000020905	-819
ENSBTAG00000024909	-819
ENSBTAG00000001843	-817
ENSBTAG00000007460	-817
ENSBTAG00000014315	-817
ENSBTAG00000007074	-816
ENSBTAG00000040061	-816
ENSBTAG00000043979	-816
ENSBTAG00000002626	-815
ENSBTAG00000005826	-815
ENSBTAG00000006182	-814
ENSBTAG00000010370	-814
ENSBTAG00000016287	-814
ENSBTAG00000023970	-814
ENSBTAG00000046623	-814
ENSBTAG00000008952	-813
ENSBTAG00000020850	-813
ENSBTAG00000005181	-812
ENSBTAG00000015157	-812
ENSBTAG00000018406	-812
ENSBTAG00000001564	-811
ENSBTAG00000002434	-811
ENSBTAG00000004912	-811
ENSBTAG00000018471	-811
ENSBTAG00000040367	-811
ENSBTAG00000040512	-811
ENSBTAG00000047966	-811
ENSBTAG00000002227	-810
ENSBTAG00000004709	-810
ENSBTAG00000015283	-810
ENSBTAG00000012594	-809
ENSBTAG00000020387	-809
ENSBTAG00000032515	-809
ENSBTAG00000002055	-808
ENSBTAG00000007482	-808
ENSBTAG00000008920	-808
ENSBTAG00000014502	-808
ENSBTAG00000016603	-808
ENSBTAG00000001485	-807
ENSBTAG00000001693	-807
ENSBTAG00000004512	-807
ENSBTAG00000007979	-807
ENSBTAG00000009278	-807
ENSBTAG00000012704	-807
ENSBTAG00000012890	-807
ENSBTAG00000021029	-807
ENSBTAG00000004732	-806
ENSBTAG00000030317	-806
ENSBTAG00000004283	-805
ENSBTAG00000009888	-805
ENSBTAG00000012991	-805
ENSBTAG00000044185	-805
ENSBTAG00000002081	-804
ENSBTAG00000002953	-803
ENSBTAG00000032150	-803
ENSBTAG00000013486	-802
ENSBTAG00000045991	-802
ENSBTAG00000024534	-801
ENSBTAG00000005099	-800
ENSBTAG00000039581	-800
ENSBTAG00000000010	-799
ENSBTAG00000008061	-799
ENSBTAG00000021351	-799
ENSBTAG00000012510	-798
ENSBTAG00000022449	-798
ENSBTAG00000006338	-797
ENSBTAG00000011003	-797
ENSBTAG00000015678	-797
ENSBTAG00000016822	-797
ENSBTAG00000006129	-796
ENSBTAG00000018098	-796
ENSBTAG00000003315	-795
ENSBTAG00000015487	-795
ENSBTAG00000032964	-795
ENSBTAG00000037490	-795
ENSBTAG00000042946	-795
ENSBTAG00000000682	-794
ENSBTAG00000010511	-794
ENSBTAG00000018528	-794
ENSBTAG00000047314	-794
ENSBTAG00000000246	-792
ENSBTAG00000006816	-792
ENSBTAG00000011470	-792
ENSBTAG00000013856	-792
ENSBTAG00000015509	-792
ENSBTAG00000020783	-792
ENSBTAG00000008169	-791
ENSBTAG00000021503	-791
ENSBTAG00000014456	-790
ENSBTAG00000019182	-790
ENSBTAG00000020737	-790
ENSBTAG00000021756	-790
ENSBTAG00000047502	-790
ENSBTAG00000002654	-788
ENSBTAG00000005865	-788
ENSBTAG00000031071	-788
ENSBTAG00000021482	-787
ENSBTAG00000030769	-787
ENSBTAG00000047461	-787
ENSBTAG00000003872	-786
ENSBTAG00000006610	-786
ENSBTAG00000011684	-786
ENSBTAG00000004416	-785
ENSBTAG00000014843	-785
ENSBTAG00000021865	-785
ENSBTAG00000002644	-784
ENSBTAG00000003690	-784
ENSBTAG00000017739	-784
ENSBTAG00000031044	-784
ENSBTAG00000037457	-784
ENSBTAG00000000340	-783
ENSBTAG00000010639	-783
ENSBTAG00000013753	-783
ENSBTAG00000000419	-782
ENSBTAG00000002614	-782
ENSBTAG00000009498	-782
ENSBTAG00000011268	-782
ENSBTAG00000013556	-782
ENSBTAG00000015772	-782
ENSBTAG00000019110	-782
ENSBTAG00000019394	-782
ENSBTAG00000019735	-782
ENSBTAG00000004643	-781
ENSBTAG00000004901	-781
ENSBTAG00000015802	-781
ENSBTAG00000046049	-781
ENSBTAG00000002960	-780
ENSBTAG00000014299	-780
ENSBTAG00000030493	-780
ENSBTAG00000005397	-779
ENSBTAG00000007577	-779
ENSBTAG00000015334	-779
ENSBTAG00000005373	-778
ENSBTAG00000021023	-778
ENSBTAG00000019070	-777
ENSBTAG00000044972	-777
ENSBTAG00000002316	-776
ENSBTAG00000011401	-776
ENSBTAG00000019805	-776
ENSBTAG00000027059	-776
ENSBTAG00000032674	-776
ENSBTAG00000047700	-776
ENSBTAG00000014284	-775
ENSBTAG00000015649	-775
ENSBTAG00000017856	-775
ENSBTAG00000033217	-775
ENSBTAG00000017872	-774
ENSBTAG00000013588	-773
ENSBTAG00000015158	-773
ENSBTAG00000020428	-773
ENSBTAG00000023823	-773
ENSBTAG00000026966	-773
ENSBTAG00000038132	-773
ENSBTAG00000046008	-773
ENSBTAG00000003205	-772
ENSBTAG00000009854	-772
ENSBTAG00000015433	-772
ENSBTAG00000009384	-771
ENSBTAG00000017077	-771
ENSBTAG00000019018	-771
ENSBTAG00000019746	-771
ENSBTAG00000019782	-771
ENSBTAG00000032372	-771
ENSBTAG00000037508	-771
ENSBTAG00000003126	-770
ENSBTAG00000004290	-770
ENSBTAG00000015493	-770
ENSBTAG00000016519	-770
ENSBTAG00000019198	-769
ENSBTAG00000005835	-768
ENSBTAG00000012061	-767
ENSBTAG00000012333	-767
ENSBTAG00000013468	-767
ENSBTAG00000040390	-767
ENSBTAG00000010741	-766
ENSBTAG00000030180	-766
ENSBTAG00000010923	-765
ENSBTAG00000014267	-765
ENSBTAG00000016883	-765
ENSBTAG00000006927	-764
ENSBTAG00000015704	-764
ENSBTAG00000024826	-764
ENSBTAG00000038235	-764
ENSBTAG00000006440	-763
ENSBTAG00000002610	-762
ENSBTAG00000032450	-762
ENSBTAG00000014679	-761
ENSBTAG00000014731	-760
ENSBTAG00000021120	-760
ENSBTAG00000001507	-759
ENSBTAG00000016717	-759
ENSBTAG00000018880	-759
ENSBTAG00000020444	-759
ENSBTAG00000004781	-758
ENSBTAG00000008330	-758
ENSBTAG00000015101	-758
ENSBTAG00000024772	-758
ENSBTAG00000045577	-758
ENSBTAG00000003455	-757
ENSBTAG00000015686	-757
ENSBTAG00000018845	-757
ENSBTAG00000004316	-756
ENSBTAG00000004736	-756
ENSBTAG00000014522	-756
ENSBTAG00000044059	-756
ENSBTAG00000000175	-755
ENSBTAG00000000562	-755
ENSBTAG00000018986	-755
ENSBTAG00000021432	-755
ENSBTAG00000001223	-754
ENSBTAG00000007702	-754
ENSBTAG00000009109	-754
ENSBTAG00000009139	-754
ENSBTAG00000015821	-754
ENSBTAG00000021705	-754
ENSBTAG00000026919	-754
ENSBTAG00000034905	-754
ENSBTAG00000009818	-753
ENSBTAG00000009915	-753
ENSBTAG00000018902	-753
ENSBTAG00000047739	-753
ENSBTAG00000011896	-752
ENSBTAG00000017139	-752
ENSBTAG00000018928	-752
ENSBTAG00000021773	-752
ENSBTAG00000047147	-752
ENSBTAG00000011772	-751
ENSBTAG00000022032	-751
ENSBTAG00000042461	-751
ENSBTAG00000001450	-750
ENSBTAG00000018717	-750
ENSBTAG00000000593	-749
ENSBTAG00000030540	-749
ENSBTAG00000011855	-748
ENSBTAG00000015052	-748
ENSBTAG00000020626	-748
ENSBTAG00000025310	-748
ENSBTAG00000004423	-747
ENSBTAG00000009159	-747
ENSBTAG00000035782	-747
ENSBTAG00000024688	-746
ENSBTAG00000000789	-745
ENSBTAG00000004243	-745
ENSBTAG00000019808	-745
ENSBTAG00000022829	-745
ENSBTAG00000002145	-744
ENSBTAG00000009362	-744
ENSBTAG00000017967	-744
ENSBTAG00000015571	-743
ENSBTAG00000016415	-743
ENSBTAG00000007909	-742
ENSBTAG00000013406	-742
ENSBTAG00000023186	-742
ENSBTAG00000038428	-742
ENSBTAG00000038438	-742
ENSBTAG00000043341	-742
ENSBTAG00000014605	-741
ENSBTAG00000015025	-741
ENSBTAG00000019648	-741
ENSBTAG00000046088	-741
ENSBTAG00000005120	-740
ENSBTAG00000019600	-740
ENSBTAG00000046612	-740
ENSBTAG00000008186	-739
ENSBTAG00000008303	-739
ENSBTAG00000048118	-739
ENSBTAG00000002147	-738
ENSBTAG00000004051	-738
ENSBTAG00000014806	-738
ENSBTAG00000001398	-737
ENSBTAG00000008293	-737
ENSBTAG00000010691	-737
ENSBTAG00000039772	-737
ENSBTAG00000020439	-736
ENSBTAG00000044888	-736
ENSBTAG00000002869	-735
ENSBTAG00000006999	-735
ENSBTAG00000010298	-735
ENSBTAG00000014096	-735
ENSBTAG00000018074	-735
ENSBTAG00000011898	-734
ENSBTAG00000017370	-734
ENSBTAG00000004028	-733
ENSBTAG00000005280	-733
ENSBTAG00000012592	-733
ENSBTAG00000022808	-733
ENSBTAG00000031165	-733
ENSBTAG00000032503	-733
ENSBTAG00000046533	-733
ENSBTAG00000007127	-732
ENSBTAG00000010787	-732
ENSBTAG00000001425	-731
ENSBTAG00000001567	-731
ENSBTAG00000004400	-731
ENSBTAG00000013916	-731
ENSBTAG00000016137	-731
ENSBTAG00000016902	-731
ENSBTAG00000003609	-730
ENSBTAG00000011730	-730
ENSBTAG00000018167	-730
ENSBTAG00000003846	-729
ENSBTAG00000015486	-729
ENSBTAG00000031483	-729
ENSBTAG00000015944	-728
ENSBTAG00000046766	-728
ENSBTAG00000000536	-727
ENSBTAG00000006122	-727
ENSBTAG00000007639	-727
ENSBTAG00000014310	-727
ENSBTAG00000021918	-727
ENSBTAG00000010243	-726
ENSBTAG00000019812	-726
ENSBTAG00000032331	-726
ENSBTAG00000047116	-726
ENSBTAG00000047138	-726
ENSBTAG00000005166	-725
ENSBTAG00000013145	-725
ENSBTAG00000040051	-725
ENSBTAG00000003568	-724
ENSBTAG00000010949	-724
ENSBTAG00000011752	-724
ENSBTAG00000013461	-724
ENSBTAG00000015049	-724
ENSBTAG00000015738	-724
ENSBTAG00000047955	-724
ENSBTAG00000004034	-723
ENSBTAG00000011327	-723
ENSBTAG00000017706	-723
ENSBTAG00000020237	-723
ENSBTAG00000020540	-723
ENSBTAG00000044153	-723
ENSBTAG00000001926	-722
ENSBTAG00000006134	-722
ENSBTAG00000012235	-722
ENSBTAG00000030929	-722
ENSBTAG00000006027	-721
ENSBTAG00000016168	-721
ENSBTAG00000016335	-721
ENSBTAG00000016975	-721
ENSBTAG00000019008	-721
ENSBTAG00000002260	-720
ENSBTAG00000003981	-720
ENSBTAG00000013184	-720
ENSBTAG00000045495	-720
ENSBTAG00000006135	-719
ENSBTAG00000006667	-719
ENSBTAG00000012403	-719
ENSBTAG00000018960	-719
ENSBTAG00000031716	-719
ENSBTAG00000038920	-719
ENSBTAG00000005844	-718
ENSBTAG00000020050	-718
ENSBTAG00000039951	-718
ENSBTAG00000003665	-717
ENSBTAG00000005355	-717
ENSBTAG00000014925	-717
ENSBTAG00000005042	-716
ENSBTAG00000009305	-716
ENSBTAG00000016387	-716
ENSBTAG00000019002	-716
ENSBTAG00000021506	-716
ENSBTAG00000011661	-715
ENSBTAG00000012896	-715
ENSBTAG00000020954	-715
ENSBTAG00000000226	-714
ENSBTAG00000001979	-714
ENSBTAG00000005275	-714
ENSBTAG00000005284	-714
ENSBTAG00000016751	-714
ENSBTAG00000030281	-714
ENSBTAG00000042837	-714
ENSBTAG00000012003	-713
ENSBTAG00000019294	-713
ENSBTAG00000033662	-713
ENSBTAG00000010397	-712
ENSBTAG00000011332	-712
ENSBTAG00000012972	-712
ENSBTAG00000016046	-712
ENSBTAG00000046517	-712
ENSBTAG00000047134	-712
ENSBTAG00000006235	-711
ENSBTAG00000006647	-711
ENSBTAG00000009245	-711
ENSBTAG00000017306	-711
ENSBTAG00000022009	-711
ENSBTAG00000044058	-710
ENSBTAG00000000721	-709
ENSBTAG00000009219	-709
ENSBTAG00000024000	-709
ENSBTAG00000025659	-709
ENSBTAG00000044071	-709
ENSBTAG00000025219	-708
ENSBTAG00000001888	-707
ENSBTAG00000009804	-707
ENSBTAG00000011248	-707
ENSBTAG00000011954	-707
ENSBTAG00000012595	-707
ENSBTAG00000012816	-707
ENSBTAG00000024822	-707
ENSBTAG00000003709	-706
ENSBTAG00000011937	-706
ENSBTAG00000014733	-706
ENSBTAG00000020423	-706
ENSBTAG00000003968	-705
ENSBTAG00000008939	-705
ENSBTAG00000020330	-705
ENSBTAG00000021273	-705
ENSBTAG00000000995	-704
ENSBTAG00000005158	-704
ENSBTAG00000017213	-704
ENSBTAG00000019001	-704
ENSBTAG00000020654	-704
ENSBTAG00000004315	-703
ENSBTAG00000004368	-703
ENSBTAG00000005792	-703
ENSBTAG00000008185	-703
ENSBTAG00000019687	-703
ENSBTAG00000000363	-702
ENSBTAG00000009154	-702
ENSBTAG00000009845	-702
ENSBTAG00000046056	-702
ENSBTAG00000046176	-702
ENSBTAG00000001796	-701
ENSBTAG00000004081	-701
ENSBTAG00000010506	-701
ENSBTAG00000015255	-701
ENSBTAG00000017788	-700
ENSBTAG00000018478	-700
ENSBTAG00000031134	-700
ENSBTAG00000039307	-700
ENSBTAG00000006117	-699
ENSBTAG00000019156	-699
ENSBTAG00000021556	-699
ENSBTAG00000000501	-698
ENSBTAG00000009536	-698
ENSBTAG00000013513	-698
ENSBTAG00000021617	-698
ENSBTAG00000001739	-696
ENSBTAG00000004509	-696
ENSBTAG00000008953	-696
ENSBTAG00000006260	-695
ENSBTAG00000000415	-694
ENSBTAG00000010681	-694
ENSBTAG00000013866	-694
ENSBTAG00000015808	-694
ENSBTAG00000030591	-694
ENSBTAG00000031249	-694
ENSBTAG00000037902	-694
ENSBTAG00000021724	-693
ENSBTAG00000021742	-693
ENSBTAG00000026394	-693
ENSBTAG00000003062	-692
ENSBTAG00000019680	-692
ENSBTAG00000000705	-691
ENSBTAG00000004544	-691
ENSBTAG00000005760	-691
ENSBTAG00000002179	-690
ENSBTAG00000017517	-690
ENSBTAG00000038131	-690
ENSBTAG00000044075	-690
ENSBTAG00000044125	-690
ENSBTAG00000046886	-690
ENSBTAG00000001348	-689
ENSBTAG00000004962	-689
ENSBTAG00000009667	-689
ENSBTAG00000009887	-689
ENSBTAG00000034885	-689
ENSBTAG00000046730	-689
ENSBTAG00000001233	-688
ENSBTAG00000016282	-687
ENSBTAG00000026645	-687
ENSBTAG00000048145	-687
ENSBTAG00000010167	-686
ENSBTAG00000019931	-686
ENSBTAG00000045867	-686
ENSBTAG00000009620	-685
ENSBTAG00000014176	-685
ENSBTAG00000010220	-684
ENSBTAG00000030584	-684
ENSBTAG00000005147	-683
ENSBTAG00000010018	-683
ENSBTAG00000015453	-683
ENSBTAG00000017840	-683
ENSBTAG00000018053	-683
ENSBTAG00000012702	-682
ENSBTAG00000022427	-682
ENSBTAG00000037449	-682
ENSBTAG00000037661	-682
ENSBTAG00000044070	-682
ENSBTAG00000045702	-682
ENSBTAG00000045824	-682
ENSBTAG00000000222	-681
ENSBTAG00000010401	-681
ENSBTAG00000027075	-681
ENSBTAG00000039366	-681
ENSBTAG00000045889	-681
ENSBTAG00000006563	-680
ENSBTAG00000009535	-679
ENSBTAG00000010851	-679
ENSBTAG00000014253	-679
ENSBTAG00000016122	-679
ENSBTAG00000017584	-679
ENSBTAG00000018812	-679
ENSBTAG00000046900	-679
ENSBTAG00000004029	-678
ENSBTAG00000020990	-678
ENSBTAG00000023563	-678
ENSBTAG00000026156	-678
ENSBTAG00000012385	-677
ENSBTAG00000014576	-677
ENSBTAG00000035675	-677
ENSBTAG00000047449	-677
ENSBTAG00000047806	-677
ENSBTAG00000000746	-676
ENSBTAG00000007837	-676
ENSBTAG00000013491	-676
ENSBTAG00000014782	-676
ENSBTAG00000017387	-676
ENSBTAG00000017771	-676
ENSBTAG00000020407	-676
ENSBTAG00000020961	-676
ENSBTAG00000024199	-676
ENSBTAG00000014592	-675
ENSBTAG00000021291	-675
ENSBTAG00000025280	-675
ENSBTAG00000004557	-674
ENSBTAG00000010242	-674
ENSBTAG00000015290	-674
ENSBTAG00000017430	-674
ENSBTAG00000023274	-674
ENSBTAG00000025211	-674
ENSBTAG00000046700	-674
ENSBTAG00000048179	-674
ENSBTAG00000014138	-673
ENSBTAG00000015483	-673
ENSBTAG00000020994	-673
ENSBTAG00000030432	-673
ENSBTAG00000001098	-672
ENSBTAG00000012976	-672
ENSBTAG00000017338	-672
ENSBTAG00000001360	-671
ENSBTAG00000003423	-671
ENSBTAG00000010836	-671
ENSBTAG00000014057	-671
ENSBTAG00000017426	-671
ENSBTAG00000048121	-671
ENSBTAG00000009637	-670
ENSBTAG00000019227	-670
ENSBTAG00000000987	-669
ENSBTAG00000002271	-669
ENSBTAG00000002534	-669
ENSBTAG00000003937	-669
ENSBTAG00000006702	-669
ENSBTAG00000009518	-669
ENSBTAG00000009749	-669
ENSBTAG00000040131	-669
ENSBTAG00000007067	-668
ENSBTAG00000027319	-668
ENSBTAG00000042234	-668
ENSBTAG00000043414	-668
ENSBTAG00000046260	-668
ENSBTAG00000046308	-668
ENSBTAG00000001528	-667
ENSBTAG00000004814	-667
ENSBTAG00000006002	-667
ENSBTAG00000009275	-667
ENSBTAG00000010735	-667
ENSBTAG00000011434	-667
ENSBTAG00000046054	-667
ENSBTAG00000001919	-666
ENSBTAG00000003432	-666
ENSBTAG00000009101	-665
ENSBTAG00000009963	-665
ENSBTAG00000009969	-665
ENSBTAG00000012332	-665
ENSBTAG00000003436	-664
ENSBTAG00000009789	-664
ENSBTAG00000012876	-664
ENSBTAG00000018984	-664
ENSBTAG00000026993	-664
ENSBTAG00000003842	-663
ENSBTAG00000007731	-663
ENSBTAG00000008420	-663
ENSBTAG00000010871	-663
ENSBTAG00000016887	-663
ENSBTAG00000016894	-663
ENSBTAG00000021342	-663
ENSBTAG00000039292	-663
ENSBTAG00000045979	-663
ENSBTAG00000016873	-662
ENSBTAG00000021182	-662
ENSBTAG00000013118	-661
ENSBTAG00000031874	-661
ENSBTAG00000002680	-660
ENSBTAG00000021072	-660
ENSBTAG00000048057	-660
ENSBTAG00000005932	-659
ENSBTAG00000031792	-659
ENSBTAG00000046878	-659
ENSBTAG00000015648	-658
ENSBTAG00000020751	-658
ENSBTAG00000022004	-658
ENSBTAG00000035081	-658
ENSBTAG00000040333	-658
ENSBTAG00000046481	-658
ENSBTAG00000014670	-657
ENSBTAG00000007442	-656
ENSBTAG00000011463	-656
ENSBTAG00000016278	-656
ENSBTAG00000019844	-656
ENSBTAG00000030435	-656
ENSBTAG00000020922	-655
ENSBTAG00000040338	-655
ENSBTAG00000008309	-654
ENSBTAG00000017244	-654
ENSBTAG00000038156	-654
ENSBTAG00000044606	-654
ENSBTAG00000002778	-653
ENSBTAG00000006422	-653
ENSBTAG00000015394	-653
ENSBTAG00000047761	-653
ENSBTAG00000001478	-652
ENSBTAG00000007962	-652
ENSBTAG00000019937	-652
ENSBTAG00000038251	-652
ENSBTAG00000012442	-651
ENSBTAG00000013068	-651
ENSBTAG00000014493	-651
ENSBTAG00000017175	-651
ENSBTAG00000046936	-651
ENSBTAG00000001344	-650
ENSBTAG00000011879	-650
ENSBTAG00000012756	-650
ENSBTAG00000018024	-650
ENSBTAG00000047609	-650
ENSBTAG00000000578	-649
ENSBTAG00000000622	-649
ENSBTAG00000001644	-649
ENSBTAG00000017610	-649
ENSBTAG00000000880	-648
ENSBTAG00000005272	-648
ENSBTAG00000048159	-648
ENSBTAG00000016290	-647
ENSBTAG00000017061	-647
ENSBTAG00000020605	-647
ENSBTAG00000034269	-647
ENSBTAG00000000130	-646
ENSBTAG00000003712	-646
ENSBTAG00000006495	-646
ENSBTAG00000013084	-646
ENSBTAG00000015470	-646
ENSBTAG00000017389	-646
ENSBTAG00000013264	-645
ENSBTAG00000014289	-645
ENSBTAG00000019556	-645
ENSBTAG00000030593	-645
ENSBTAG00000047136	-645
ENSBTAG00000018809	-644
ENSBTAG00000021337	-644
ENSBTAG00000036242	-644
ENSBTAG00000016145	-643
ENSBTAG00000046332	-643
ENSBTAG00000019718	-642
ENSBTAG00000008480	-641
ENSBTAG00000013961	-641
ENSBTAG00000014238	-641
ENSBTAG00000017571	-641
ENSBTAG00000026638	-641
ENSBTAG00000000687	-640
ENSBTAG00000002033	-640
ENSBTAG00000005546	-640
ENSBTAG00000002894	-639
ENSBTAG00000004953	-639
[truncated: 14,663 more rows]
