# Supplementary material for: Co-Expression Networks Reveal Potential Regulatory Roles of miRNAs in Fatty Acid Composition of Nelore Cattle
Source: Front Genet. 2019 Jul 11;10:651. doi: 10.3389/fgene.2019.00651 (PMC6637853; doi:10.3389/fgene.2019.00651)
Supplement: Supplementary file 8 [file Table_8.xlsx]

## Sheet: OA
Supplemental Table 8. Top 10 negatively and positively hubbed genes for Oleic Acid (OA) content and their associated GO terms.
Negative hub genes OA	Gene Symbol	Description	DH*	GO Terms
ENSBTAG00000040485	THEG	Theg spermatid protein	-905	GO:0007283~spermatogenesis
ENSBTAG00000031806	ZNF48	Zinc finger protein 48	-826	GO:0008270~zinc ion binding,GO:0043167~ion binding,GO:0043169~cation binding,GO:0046872~metal ion binding,GO:0046914~transition metal ion binding,
ENSBTAG00000007692	*	*	-799	*
ENSBTAG00000044830	bta-mir-339a	bta-mir-339a	-770	bta-mir-339a [Source:miRBase;Acc:MI0009806]
ENSBTAG00000007956	FRAT1	Frequently rearranged advanced T-cell lymphomas 1	-753	bta04310:Wnt signaling pathway
ENSBTAG00000032775	*	similar to ribosomal protein L23a; ribosomal protein L23a	-734	GO:0006412~translation,
ENSBTAG00000045756	*	*	-732	*
ENSBTAG00000013356	CATHL1	cathelicidin 1	-703	GO:0006952~defense response,GO:0009617~response to bacterium,GO:0042742~defense response to bacterium,
ENSBTAG00000021912	DUSP7	dual specificity phosphatase 7	-697	GO:0006470~protein amino acid dephosphorylation,GO:0006793~phosphorus metabolic process,GO:0006796~phosphate metabolic process,GO:0016311~dephosphorylation,
ENSBTAG00000009861	FRS3	fibroblast growth factor receptor substrate 3	-690	GO:0005158~insulin receptor binding,GO:0032403~protein complex binding,
Positive hub genes OA
ENSBTAG00000015100	ATP6V0E1	ATPase H+ transporting V0 subunit e1	2946	GO:0015991~ATP hydrolysis coupled proton transport,GO:0016049~cell growth,
ENSBTAG00000025221	TEX30	Testis expressed 30	2925	GO:0005634~nucleus
ENSBTAG00000014337	EIF2S3	Eukaryotic translation initiation factor 2 subunit 3	2911	GO:0001731~formation of translation preinitiation complex,GO:0006413~translational initiation,
ENSBTAG00000044066	C1orf101	Chromosome 1 open reading frame	2903
ENSBTAG00000002772	GAL3ST3	galactose-3-O-sulfotransferase 3	2902	GO:0009247~glycolipid biosynthetic process,
ENSBTAG00000024549	SNRPC	small nuclear ribonucleoprotein polypeptide C [Source:HGNC Symbol;Acc:HGNC:11157]	2885	GO:0000387~spliceosomal snRNP assembly,GO:0000395~mRNA 5'-splice site recognition,
ENSBTAG00000014060	LSM6	LSM6 homolog, U6 small nuclear RNA and mRNA degradation associated [Source:HGNC Symbol;Acc:HGNC:17017]	2880	GO:0000398~mRNA splicing, via spliceosome,GO:0030490~maturation of SSU-rRNA,
ENSBTAG00000019995	HIKESHI	Hikeshi, heat shock protein nuclear import factor [Source:HGNC Symbol;Acc:HGNC:26938]	2878	GO:0006606~protein import into nucleus,GO:0015031~protein transport,GO:0034605~cellular response to heat,
ENSBTAG00000020292	C12orf57	chromosome 12 open reading frame 57 [Source:HGNC Symbol;Acc:HGNC:29521]	2877	chain:Protein C10,modified residue,
ENSBTAG00000031082	*	Uncharacterized protein [Source:UniProtKB/TrEMBL;Acc:E1BMJ8]	2867	*

## Sheet: CLA
Supplemental Table 8. Top 10 negatively and positively hubbed genes for Conjugated Linoleic Acid (CLA) content and their associated GO terms.
Negative hub genes OA	Gene Symbol	Description	DH*	GO Terms
ENSBTAG00000005578	KAT5	Lysine acetyltransferase 5	-2126	GO:0043161~proteasome-mediated ubiquitin-dependent protein catabolic process
ENSBTAG00000046307	CEBPD	CCAAT enhancer binding protein delta	-2112	GO:0006351~transcription
ENSBTAG00000003849	GNL2	G protein nucleolar 2	-2060	GO:0042254~ribosome biogenesis
ENSBTAG00000045822	*	*	-1997	*
ENSBTAG00000002634	TMEM115	Transmembrane protein 115	-1987	GO:0006486~protein glycosylation
ENSBTAG00000042370	RF00417	*	-1977	*
ENSBTAG00000015716	ERO1A	cellular protein modification process	-1974	GO:0006464~cellular protein modification process
ENSBTAG00000016397	CDYL	chromodomain Y-like	-1966	COG_ONTOLOGY: Lipid metabolism
ENSBTAG00000005882	ZNF333	zinc finger protein 333	-1965	GO:0006355~regulation of transcription
ENSBTAG00000000647	SELENOO		-1942
Negative hub genes OA	Gene Symbol	Description	DH*	GO Terms
ENSBTAG00000013600	PSMG1	Proteasome assembly chaperone	1848	GO:0043248~proteasome assembly
ENSBTAG00000015042	WDR55	WD repeat domain	1809	GO:0006364~rRNA processing
ENSBTAG00000032684	TCTEX1D2	Tctex1 domain containing 2	1794	IPR005334:Tctex-1
ENSBTAG00000006321	RTCA	RNA 3'-terminal phosphate	1740	GO:0006396~RNA processing
ENSBTAG00000045544	LOC107131189	Eukaryotic translation initiation factor	1692	*
ENSBTAG00000018285	VAMP5	vesicle associated membrane protein 5(VAMP5)	1671	GO:0007519~skeletal muscle tissue development
ENSBTAG00000006321	RTCA	RNA 3'-terminal phosphate cyclase(RTCA)	1658	GO:0006396~RNA processing
ENSBTAG00000010508	BLVRB	biliverdin reductase B(BLVRB)	1657	GO:0055114~oxidation-reduction process
ENSBTAG00000033222	CALR3	calreticulin 3(CALR3)	1637	GO:0006457~protein folding
ENSBTAG00000011512	PIGP	phosphatidylinositol glycan anchor biosynthesis class P(PIGP)	1629	GO:0006506~GPI anchor biosynthetic process
